# Supplementary material for: The Transcriptomic Signature of RacA Activation and Inactivation Provides New Insights into the Morphogenetic Network of Aspergillus niger
Source: PLoS One. 2013 Jul 24;8(7):e68946. doi: 10.1371/journal.pone.0068946 (PMC3722221; doi:10.1371/journal.pone.0068946)
Supplement: Table S4 — Subset of the transcriptome data for selected intersection of the Venn diagram. (XLSX) [file pone.0068946.s004.xlsx]

## Sheet: code
Comparisons:
01 = racA.wt.4 – racA.wt.2
02 = racA.G12V.4 – racA.G12V.2
03 = racA.G12V.2 – racA.wt.2
04 = racA.G12V.4 – racA.wt.4
05 = (racA.G12V.4 - racA.G12V.2) - (racA.wt.4 – racA.wt.2)
06 = racA.D – wt
Strain codes
racA.wt.4: Strain MA1.8 expressing PglaA-RacA, 4 h after maltose shift
racA.wt.2: Strain MA1.8 expressing PglaA-RacA, 2 h after maltose shift
racA.G12V.4: Strain MA60.15 expressing PglaA-RacA, 4 h after maltose shift
racA.G12V.2: Strain MA60.15 expressing PglaA-RacA, 2 h after maltose shift
racA.D: Strain MA80.1, in which racA is deleted
wt: Strain N402

## Sheet: 03.04 UP
ORF	alias	annotation	061018MJA_ANIGERa_AR01.CEL	061018MJA_ANIGERa_AR07.CEL	061018MJA_ANIGERa_AR02.CEL	061018MJA_ANIGERa_AR08.CEL	061018MJA_ANIGERa_AR03.CEL	061018MJA_ANIGERa_AR05.CEL	061018MJA_ANIGERa_AR04.CEL	061018MJA_ANIGERa_AR06.CEL	080805MJA_ANIGERa_100480-01.CEL	080805MJA_ANIGERa_100480-02.CEL	080805MJA_ANIGERa_100480-06.CEL	080807MJA_ANIGERa_100480-20.CEL	080807MJA_ANIGERa_100480-21.CEL	080807MJA_ANIGERa_100480-22.CEL	racA.wt.2	racA.wt.4	racA.G12V.2	racA.G12V.4	wt	racA.D	FC 01	FC 02	FC 03	FC 04	FC 05	FC 06	pValue 01	pValue 02	pValue 03	pValue 04	pValue 05	pValue 06	FDR 01	FDR 02	FDR 03	FDR 04	FDR 05	FDR 06	decide (FDR < 0.05) 01	decide (FDR < 0.05) 02	decide (FDR < 0.05) 03	decide (FDR < 0.05) 04	decide (FDR < 0.05) 05	decide (FDR < 0.05) 06
An14g02760	An00g00179	endoglucanase A eglA - Aspergillus niger	3.49263	3.56838	3.35044	3.40966	5.61695	5.68347	4.17861	4.05843	3.38853	3.23027	3.42438	3.33876	3.2555	3.32821	11.5555	10.4111	50.2206	17.3699	10.1804	9.9004	0.900966	0.345872	4.34604	1.6684	0.38389	0.972495	0.107126	1.20681e-09	3.30773e-11	2.68133e-06	1.53301e-07	0.577731	0.283126	1.05513e-06	5.78397e-08	0.000629262	6.70166e-05	0.901363	0	-1	1	1	-1	0
An02g04060	An00g00786	hypothetical protein	5.48191	5.50216	4.69628	4.79835	6.93754	6.92294	6.0807	5.55377	5.17397	5.31446	5.30748	5.1449	5.15202	5.07052	45.0057	26.8586	121.958	56.3849	38.4604	34.8353	0.596782	0.46233	2.70983	2.09932	0.774705	0.905746	0.000158332	3.88866e-06	2.89326e-07	5.72416e-06	0.078269	0.219406	0.00265258	0.000118898	3.26402e-05	0.001058	0.226829	0.722289	-1	-1	1	1	0	0
An18g02120	An00g00955	hypothetical protein	5.9766	5.72228	5.52868	5.32427	6.09528	6.50421	6.22196	6.04233	5.32703	5.40785	5.096	5.26098	5.23013	5.31861	57.6577	43.0064	78.7794	70.139	38.7725	38.5833	0.745892	0.890321	1.36633	1.6309	1.19363	0.995122	0.0160095	0.285693	0.0114941	0.000581961	0.251968	0.954945	0.0767503	0.455013	0.0443742	0.0254261	0.49422	0.991428	0	0	1	1	0	0
An09g05520	An00g01534	hypothetical protein	7.44124	6.98367	6.60802	6.45124	8.73167	8.64213	7.67081	7.68515	5.41447	4.98899	5.13773	4.99472	5.18474	5.26248	148.309	92.3876	412.113	204.787	36.2623	35.4402	0.622942	0.496919	2.77876	2.21661	0.797697	0.977329	0.00133994	5.56838e-05	1.476e-06	1.69392e-05	0.180912	0.806662	0.0125297	0.000731094	9.11946e-05	0.00234616	0.402167	0.963407	-1	-1	1	1	0	0
An16g07920	An00g01632	strong similarity to hypothetical protein EAA64623.1 - Aspergillus nidulans	9.4599	9.2936	7.33828	7.51025	10.3469	9.90376	9.38516	8.94027	6.6901	6.64295	6.47147	7.99951	7.73254	8.51706	664.787	171.762	1116.94	573.128	97.1072	271.167	0.258371	0.513123	1.68015	3.33676	1.98599	2.79245	3.39966e-06	0.00155817	0.00793792	1.05163e-05	0.0115854	6.96449e-06	0.000178119	0.00922827	0.0330952	0.00161662	0.0547342	0.00256385	-1	-1	1	1	0	1
An12g10730	An00g01737	strong similarity to hypothetical protein AAO51653.1 - Dictyostelium discoideum	6.21389	5.81193	6.25378	6.03222	6.72882	6.45129	7.06536	6.67932	6.33818	6.6473	6.39375	6.15961	6.14547	6.01784	64.5751	70.6686	96.3394	117.16	88.019	68.9578	1.09436	1.21612	1.4919	1.65788	1.11126	0.783442	0.460752	0.124959	0.00581943	0.00121208	0.540173	0.0273679	0.683041	0.252682	0.0258192	0.0391425	0.762741	0.387499	0	0	1	1	0	0
An02g13650	An00g02485	hypothetical protein	4.58982	4.33794	4.31788	4.03728	5.37341	4.90677	5.82601	5.1405	4.7183	4.79901	4.69995	4.41947	4.61062	4.34431	22.068	18.0958	35.2632	44.7326	26.7059	21.9802	0.820003	1.26853	1.59794	2.47199	1.54699	0.823048	0.200257	0.130519	0.00797789	5.8628e-05	0.0574059	0.12958	0.42142	0.260927	0.0332151	0.0057353	0.180908	0.632997	0	0	1	1	0	0
An04g09440	An00g03011	hypothetical protein [truncated ORF]	5.72347	5.90031	3.75904	4.2454	7.83719	7.48374	6.53012	6.07683	4.12414	4.10495	4.1082	4.35926	4.44617	4.9255	56.1762	16.0247	202.316	78.9832	17.2967	23.8675	0.285257	0.390396	3.60145	4.92885	1.36858	1.37989	3.44764e-06	5.2519e-05	2.79269e-06	3.01019e-07	0.165833	0.022784	0.000179167	0.000701708	0.000124022	0.00013638	0.379368	0.362159	-1	-1	1	1	0	0
An11g07330	An00g03662	similarity to 6-hydroxynicotinic acid mono-oxygenase 6-HNAMO from patent JP09121864-A - Pseudomonas fluorescens	4.73007	4.7467	5.40258	4.50961	12.1058	11.996	8.61686	9.03696	4.09922	4.15691	4.28609	4.44613	4.28076	4.44349	26.693	31.0408	4243.09	454.115	18.1355	20.9681	1.16288	0.107024	158.959	14.6296	0.0920337	1.15619	0.353298	1.28771e-08	1.49596e-12	1.76277e-09	2.54945e-07	0.277759	0.59182	4.18406e-06	6.97567e-09	2.05495e-06	8.49994e-05	0.771553	0	-1	1	1	-1	0
An11g01410	An00g03847	similarity to atrazine chlorohydrolase atzA - Pseudomonas sp.	4.56195	4.25321	6.27867	6.42686	7.76954	7.68827	7.47951	8.49059	5.65889	5.8901	5.65012	6.20379	6.21656	6.16762	21.2234	81.7285	212.144	253.361	53.1883	73.3128	3.85087	1.19429	9.99579	3.10004	0.310134	1.37836	4.84401e-06	0.308957	1.92017e-08	2.57895e-05	0.00038759	0.037326	0.000226631	0.479636	4.88387e-06	0.00315605	0.00476717	0.43549	1	0	1	1	-1	0
An07g00950	An00g03907	similarity to aspartyl proteinase candidapepsin - Candida albicans	4.00552	3.77842	4.0812	4.10718	6.33953	6.29803	7.94921	6.99699	4.12139	4.085	4.15145	4.33595	4.22467	4.4792	14.8456	17.0795	79.8256	177.675	17.3791	20.3451	1.15047	2.22579	5.37704	10.4029	1.93468	1.17066	0.381547	0.000268174	2.30308e-07	6.76451e-09	0.0110745	0.235276	0.61719	0.00234614	3.12614e-05	6.30858e-06	0.0529977	0.73563	0	1	1	1	0	0
An01g08150	An00g03916	similarity to carbonyl reductase CBR - Homo sapiens	4.66474	4.67364	4.48093	4.38334	8.83677	8.98546	6.24861	6.23796	4.54028	4.60718	4.551	5.92612	5.93359	5.85101	25.4429	21.5877	481.407	75.7557	23.6891	59.8622	0.848478	0.157363	18.9211	3.5092	0.185465	2.52699	0.0100596	7.17378e-13	3.84497e-15	5.47427e-11	9.79366e-11	1.67118e-10	0.0550348	6.65752e-09	5.37873e-11	3.10122e-07	1.37004e-06	5.84452e-07	0	-1	1	1	-1	1
An11g09440	An00g03929	similarity to cDNA LEC14B - Lithospermum erythrorhizon	4.4821	4.18434	4.40531	4.23805	5.78556	5.71624	4.78955	5.00055	4.41389	4.50921	4.73649	4.86885	4.99738	4.76987	20.1571	19.9966	53.8508	29.7548	23.4773	29.4195	0.992034	0.552542	2.67155	1.488	0.556978	1.2531	0.933639	4.98824e-05	3.6194e-07	0.00131998	0.000980767	0.0130209	0.970982	0.000678798	3.7505e-05	0.0413092	0.00925148	0.289314	0	-1	1	1	-1	0
An11g07300	An00g04230	similarity to fluconazole resistance protein FLU1 - Candida albicans [truncated ORF]	3.70395	3.7847	4.61196	3.90771	9.76455	9.32209	9.26783	8.9318	3.80638	3.77646	3.86886	4.0178	4.07661	3.83001	13.4015	19.1575	746.149	548.679	14.0962	15.723	1.4295	0.735347	55.6766	28.6404	0.514407	1.11541	0.0296621	0.054992	8.08657e-12	6.07924e-11	0.00718255	0.371394	0.117748	0.13987	2.82808e-08	3.10122e-07	0.0385855	0.825589	0	0	1	1	-1	0
An06g00370	An00g04284	similarity to glutathione S-transferase isoI - Rhodococcus sp.	5.6814	4.91057	7.1368	6.68725	10.8661	10.1414	9.32785	9.48942	5.58956	5.08342	5.40744	5.62873	5.64229	7.23742	39.2872	120.428	1451.89	679.642	41.0736	71.9778	3.06532	0.468107	36.9559	5.64356	0.152711	1.75241	0.00567945	0.0410394	2.23007e-07	0.000245022	0.00185218	0.0603193	0.0368174	0.112945	3.11112e-05	0.0142224	0.0143544	0.510074	1	0	1	1	-1	0
An11g07320	An00g04295	similarity to glyoxalase II Glo2 - Saccharomyces cerevisiae	4.13366	3.95822	4.31308	3.99954	11.3932	11.4183	8.35333	9.15529	3.54927	3.61445	3.87498	3.78481	3.77443	3.64993	16.5177	17.8309	2713.11	431.827	12.8132	13.328	1.07951	0.159163	164.255	24.2178	0.14744	1.04018	0.609783	5.08812e-08	6.53085e-13	1.2563e-10	1.22424e-06	0.746706	0.789829	8.89721e-06	4.56801e-09	3.70652e-07	0.000180273	0.949598	0	-1	1	1	-1	0
An04g08620	An00g04325	similarity to heme activator protein Hap1 - Saccharomyces cerevisiae	8.21626	7.96261	7.93593	7.83747	9.5258	9.4026	8.3617	8.69314	8.52745	8.59905	8.62914	8.93983	8.89071	8.9082	272.372	236.665	706.331	368.985	384.067	482.008	0.868901	0.522397	2.59325	1.55911	0.601216	1.25501	0.105424	4.60983e-06	9.14108e-08	0.000152218	0.000829496	0.00490104	0.28074	0.000131617	1.52403e-05	0.0105939	0.00817171	0.186354	0	-1	1	1	-1	0
An15g07560	An00g04474	similarity to hypothetical protein dag11 - Agaricus bisporus	5.80796	5.35231	5.16293	4.91403	8.48257	8.18694	8.39317	7.84555	5.46335	5.2336	5.11116	5.20029	5.23936	5.72052	47.8397	32.8649	322.857	278.08	38.569	41.8375	0.686981	0.86131	6.74874	8.4613	1.25376	1.08474	0.0381344	0.370349	9.15138e-08	2.78129e-08	0.338585	0.545956	0.140569	0.541382	1.52403e-05	2.04776e-05	0.58948	0.892711	0	0	1	1	0	0
An09g05170	An00g04479	similarity to hypothetical protein 15E11.110 - Neurospora crassa	6.04159	5.94671	5.54096	5.49041	8.55265	7.62576	7.74481	6.5112	5.05931	5.72719	5.03828	5.23881	5.18604	5.15634	63.7409	45.7495	272.328	139.876	38.7179	36.599	0.717741	0.513631	4.27242	3.05744	0.715622	0.945272	0.221515	0.0242141	0.000129885	0.00105982	0.375274	0.79285	0.44843	0.0764325	0.00142042	0.0367615	0.627655	0.959037	0	0	1	1	0	0
An01g12440	An00g04654	similarity to hypothetical protein BAA13766.1 - Schizosaccharomyces pombe	6.09117	6.22638	6.15082	6.21547	7.61955	7.32936	7.43812	6.92366	6.19099	6.12706	5.99188	6.42653	6.34286	6.25714	71.4457	72.6628	177.842	145.099	68.751	81.1309	1.01704	0.815885	2.48919	1.99688	0.802218	1.18007	0.876146	0.0803241	2.62742e-06	3.69949e-05	0.168611	0.0812334	0.941181	0.183934	0.000122516	0.00417356	0.38359	0.557389	0	0	1	1	0	0
An15g02650	An00g04670	similarity to hypothetical protein CC3092 - Caulobacter crescentus	5.11782	4.86395	4.76229	4.932	7.21486	7.65185	6.55363	6.13215	5.27545	5.18553	5.55699	4.5885	4.63516	5.27117	31.7985	28.7831	172.847	81.1709	40.4853	28.4747	0.905172	0.469611	5.43571	2.82009	0.518809	0.703334	0.557469	0.000724513	4.37371e-07	5.17181e-05	0.0163788	0.0235283	0.753523	0.00507443	4.30872e-05	0.00543973	0.0710898	0.363286	0	-1	1	1	0	0
An15g07520	An00g04729	similarity to hypothetical protein mlr2143 - Mesorhizobium loti	5.26848	5.16374	6.10539	5.79427	6.65788	6.95594	7.73569	6.70567	4.53357	4.70775	4.75082	4.10047	4.45883	4.30154	37.1711	61.8127	111.965	149.156	25.3523	19.5209	1.66292	1.33216	3.01216	2.41303	0.801097	0.769985	0.0160413	0.138424	6.52682e-05	0.000434714	0.401541	0.102003	0.0768235	0.272811	0.000882671	0.0209665	0.650974	0.593038	0	0	1	1	0	0
An09g00160	An00g04762	similarity to hypothetical protein Rv0839 - Mycobacterium tuberculosis	5.92503	5.60046	5.68108	5.3394	6.95687	6.91795	6.28156	6.31183	6.05996	5.68489	5.83957	6.99642	7.24278	6.77378	54.2949	45.5772	122.565	78.613	58.1406	128.385	0.839437	0.641397	2.2574	1.72483	0.76408	2.20817	0.170597	0.00325733	2.51374e-05	0.000759682	0.139184	4.719e-06	0.382388	0.016385	0.000450829	0.0300203	0.338226	0.00206149	0	-1	1	1	0	1
An07g04540	An00g04848	similarity to hypothetical protein SPBC1685.08 - Schizosaccharomyces pombe	5.71909	5.68568	5.40279	5.3453	7.99038	8.56511	5.96166	6.264	5.10175	5.34809	5.31774	5.13965	5.07379	4.9517	52.0703	41.4715	310.349	69.2062	38.2095	33.2446	0.796452	0.222995	5.96019	1.66877	0.279985	0.87006	0.0724366	3.50223e-08	5.38881e-09	0.000899886	6.62413e-06	0.165209	0.21867	6.74316e-06	2.03741e-06	0.0333029	0.000396004	0.673792	0	-1	1	1	-1	0
An04g04280	An00g04879	similarity to hypothetical protein SPBC800.14c - Schizosaccharomyces pombe	4.7165	5.12306	5.68783	5.28298	9.38312	9.77957	9.4084	9.93288	4.67677	4.58669	4.60863	4.75935	4.97993	5.04129	30.2692	44.7994	766.079	814.99	24.6589	30.4181	1.48003	1.06385	25.3089	18.192	0.7188	1.23356	0.0178288	0.670332	7.84059e-11	2.59121e-10	0.126677	0.0960307	0.0828045	0.795426	9.97109e-08	5.17835e-07	0.317921	0.585335	0	0	1	1	0	0
An04g04540	An00g04968	similarity to hypothetical protein YLR352w - Saccharomyces cerevisiae	4.33293	4.34571	4.3703	4.30693	5.18689	5.34177	4.83461	5.03676	4.29513	4.11706	4.15298	4.28106	4.36437	4.16173	20.2425	20.2326	38.4345	30.6048	18.2319	19.2803	0.999511	0.796284	1.8987	1.51264	0.796674	1.0575	0.994584	0.00771279	1.51341e-06	9.54226e-05	0.0428924	0.351708	0.998437	0.0321593	9.28559e-05	0.00794563	0.146669	0.815252	0	-1	1	1	0	0
An18g02310	An00g05252	hypothetical protein	5.35717	5.29219	5.27964	5.32072	6.32206	5.85694	6.21034	5.8609	5.1291	5.04799	5.01754	5.10049	4.98518	5.23213	40.0764	39.4015	68.0962	65.5998	33.4719	34.4381	0.983158	0.963339	1.69916	1.66491	0.979841	1.02887	0.872754	0.725287	0.000306235	0.000420017	0.891974	0.742879	0.939656	0.831642	0.00264625	0.0204468	0.955862	0.949166	0	0	1	1	0	0
An14g02970	An00g05460	similarity to phytochrome phy - Synechocystis sp.	3.72521	3.66535	3.66146	3.54289	4.65631	4.56461	3.89981	4.02648	3.54517	3.45756	3.54373	3.71089	3.61592	3.56021	12.9535	12.144	24.4279	15.5964	11.4358	12.372	0.937504	0.638467	1.88581	1.28429	0.681029	1.08186	0.296355	8.74457e-06	2.69826e-07	0.00128952	0.000697989	0.129537	0.534104	0.000200867	3.17705e-05	0.0408124	0.00721118	0.632997	0	-1	1	1	-1	0
An11g07290	An00g05930	similarity to spectinomycin adenylyltransferase spc - Staphylococcus aureus	6.20632	6.13802	6.24534	6.36709	9.61573	7.9325	7.68514	8.05751	6.61979	6.38428	6.2944	6.36415	6.34581	6.55061	72.1121	79.1333	437.796	234.156	86.3917	85.6386	1.09737	0.534852	6.07105	2.95901	0.487396	0.991283	0.729547	0.0354399	2.27737e-05	0.00154812	0.0778745	0.968085	0.863129	0.101571	0.000426481	0.0455931	0.226108	0.993074	0	0	1	1	0	0
An13g02990	An00g06089	similarity to hypothetical protein EAA71271.1 - Gibberella zeae	5.49617	5.41144	5.73193	5.19601	9.98761	11.0949	7.62108	8.88841	4.71944	5.30702	5.03055	4.66091	4.47793	4.50865	43.8287	44.1386	1490.16	305.44	32.4243	23.4118	1.00707	0.204972	33.9996	6.92002	0.203533	0.722044	0.980089	0.000115994	4.4433e-08	1.92229e-05	0.0017218	0.175683	0.992074	0.0012415	9.14079e-06	0.00258566	0.013701	0.684291	0	-1	1	1	-1	0
An13g02980	An00g06094	similarity to hypothetical protein encoded by An01g08440 - Aspergillus niger	7.76585	7.18244	7.08237	6.79219	12.4504	13.2505	10.0745	11.6471	5.49004	5.89791	5.63241	4.86284	4.84674	5.05957	177.804	122.554	7385.33	1859.64	51.0363	30.3379	0.689268	0.251801	41.5364	15.174	0.365317	0.594438	0.218653	0.000486718	3.55052e-08	9.54571e-07	0.0293592	0.0468913	0.44541	0.00372733	7.76066e-06	0.000296744	0.109551	0.469606	0	-1	1	1	0	0
An14g03540	An00g06120	similarity to hypothetical protein encoded by An08g01290 - Aspergillus niger	5.29404	4.89278	4.3083	4.43194	5.66735	5.96976	4.88211	5.34101	4.62795	4.36219	4.57405	4.62439	4.78199	4.72005	34.1405	20.6793	56.4364	34.5727	22.9655	26.1513	0.605711	0.612595	1.65306	1.67185	1.01137	1.13872	0.00138065	0.00162548	0.00135548	0.00115273	0.947738	0.208294	0.0128077	0.00950619	0.0082487	0.0384389	0.979081	0.714349	-1	-1	1	1	0	0
An04g10110	An00g06204	similarity to hypothetical protein encoded by An11g00040 - Aspergillus niger	4.41352	4.03701	3.53651	3.55131	5.70196	5.61132	5.45605	4.68201	3.3935	3.5941	3.31344	3.59881	3.39692	3.56895	18.7039	11.6633	50.445	33.5684	10.8054	11.484	0.623577	0.665445	2.69703	2.87811	1.06714	1.0628	0.00685752	0.0155809	2.14292e-05	1.17816e-05	0.754278	0.612639	0.041909	0.0548608	0.000408409	0.00177218	0.888705	0.910948	-1	0	1	1	0	0
An16g05970	An00g06515	similarity to UDP-glucuronosyltransferase UGT2B11 - Homo sapiens	5.33355	4.78203	4.68622	4.67732	6.25369	5.61933	7.26542	8.03781	5.27264	5.57241	5.14848	5.61699	5.82313	5.37767	33.3079	25.6657	61.2444	201.079	40.2573	48.7026	0.770559	3.28322	1.83873	7.83453	4.26083	1.20978	0.205882	6.59809e-05	0.00915823	3.15966e-07	0.000236353	0.254295	0.429222	0.000818994	0.037105	0.000138127	0.00349507	0.751601	0	1	1	1	1	0
An03g05110	An00g06520	similarity to hypothetical protein BAB11562.1 - Arabidopsis thaliana	5.3026	5.07394	5.62672	5.25506	11.1802	11.8361	7.61921	8.39799	5.06725	5.17199	5.11548	5.15099	5.12588	5.30418	36.4607	43.4381	2912.76	257.531	34.7331	36.5978	1.19137	0.0884145	79.8877	5.92868	0.0742127	1.05368	0.324457	1.35104e-08	2.01785e-11	3.58568e-07	2.55199e-07	0.713311	0.562222	4.19993e-06	4.70461e-08	0.000152	8.49994e-05	0.940304	0	-1	1	1	-1	0
An01g05360	An00g06756	strong similarity to 42 kDa endochitinase Tham-ch - Trichoderma hamatum	7.53309	6.94341	6.16932	6.43245	8.4443	8.25287	7.29754	6.9096	5.65516	5.51635	5.59544	4.7292	4.95538	4.92565	150.984	78.8417	325.967	137.527	48.134	29.2441	0.522187	0.421904	2.15896	1.74434	0.807957	0.607557	0.00032365	2.73214e-05	7.69087e-05	0.00107879	0.262689	0.000533405	0.00444749	0.000443387	0.000989766	0.036889	0.504705	0.0526287	-1	-1	1	1	0	0
An12g04020	An00g06874	strong similarity to acetyl-CoA carboxylase SPAC56E4.04c - Schizosaccharomyces pombe	9.97169	9.97504	7.03703	6.56607	11.149	11.7058	7.71211	8.25742	7.26649	7.48413	7.31191	7.24047	7.36618	7.26721	1005.27	111.55	2754.1	253.311	163.617	156.638	0.110966	0.0919759	2.73967	2.27082	0.828867	0.957344	6.84489e-09	2.80615e-09	2.02657e-05	0.000129117	0.378079	0.718919	3.54641e-06	1.99007e-06	0.0003932	0.0096849	0.629861	0.942545	-1	-1	1	1	0	0
An01g09260	An00g06972	strong similarity to aldehyde dehydrogenase (NADP+) - Homo sapiens	7.38183	6.94245	6.08739	5.88696	7.92362	8.05058	6.96508	7.2758	6.78801	6.84359	6.7215	7.00765	7.00188	7.06975	143.225	63.4337	253.721	139.145	110.229	130.366	0.442894	0.548416	1.77148	2.19354	1.23825	1.18268	3.78873e-06	6.62896e-05	0.000102303	5.39987e-06	0.15127	0.0596248	0.000189781	0.000819916	0.00119759	0.00102079	0.355529	0.506739	-1	-1	1	1	0	0
An09g03100	An00g07040	strong similarity to alpha-amylase precursor amy - Aspergillus niger	8.1194	7.96604	7.23933	7.06462	8.9068	8.5616	8.54867	8.36271	7.59563	7.87462	7.69156	7.818	7.72947	7.79625	263.694	142.219	425.85	351.089	210.928	219.982	0.539335	0.824442	1.61494	2.46864	1.52863	1.04292	2.42262e-05	0.0552054	0.000226195	5.74718e-07	0.00655384	0.57998	0.000706043	0.140209	0.00210896	0.000201371	0.035996	0.901363	-1	0	1	1	1	0
An16g05570	An00g07163	strong similarity to aspartate transaminase - Sus scrofa	7.34321	7.19816	7.55358	7.38566	7.89733	8.37009	8.67512	8.52007	8.30532	8.49236	8.29042	8.2762	8.34652	7.89747	154.417	177.248	280.861	387.378	329.173	288.694	1.14785	1.37925	1.81885	2.18552	1.20159	0.877029	0.270729	0.0201722	0.000353796	3.50509e-05	0.298162	0.203529	0.506179	0.0667429	0.00295301	0.00402651	0.544586	0.709149	0	0	1	1	0	0
An11g00530	An00g07183	strong similarity to ATP citrate lyase - Homo sapiens	11.3691	11.5751	10.1721	9.76595	12.5356	12.6653	10.6708	10.8962	10.9813	10.8266	10.9189	11.2524	11.2341	11.2346	2840.85	1002.26	6210.25	1762.58	1922.74	2419.31	0.352801	0.283818	2.18605	1.75861	0.80447	1.25826	1.3639e-07	1.81342e-08	2.57829e-06	5.68391e-05	0.117113	0.00973734	1.90796e-05	4.77829e-06	0.000121721	0.00567945	0.301065	0.255086	-1	-1	1	1	0	0
An11g00510	An00g07184	strong similarity to ATP citrate lyase ACL1 - Sordaria macrospora	10.6262	10.6847	9.3322	8.97526	11.6992	11.8613	9.7982	9.93209	10.0185	9.7492	9.93276	10.2586	10.1915	10.1952	1612.93	569.571	3517.24	932.622	955.534	1188.63	0.353129	0.265158	2.18066	1.63741	0.75088	1.24395	7.38753e-08	5.42517e-09	1.47393e-06	0.000111285	0.0365675	0.00931239	1.2918e-05	2.52976e-06	9.11946e-05	0.00879529	0.129866	0.249084	-1	-1	1	1	0	0
An07g01250	An00g07191	strong similarity to ATP-binding cassette multidrug transport protein atrA - Aspergillus nidulans	3.67303	3.67597	4.27365	3.78483	7.40786	7.96374	7.77397	8.03612	3.77054	3.78837	3.61628	3.97642	4.03046	3.78731	12.7683	16.3275	205.9	239.693	13.2238	15.2569	1.27875	1.16412	16.1258	14.6803	0.910359	1.15375	0.0858505	0.268835	1.70373e-10	2.4926e-10	0.621131	0.206435	0.245033	0.43633	1.70239e-07	5.17835e-07	0.816405	0.71055	0	0	1	1	0	0
An16g02850	An00g07464	strong similarity to cell wall protein Crh1 - Saccharomyces cerevisiae	6.19385	6.0765	5.18566	5.09906	7.0894	6.8899	7.03487	6.74571	4.94104	5.39338	5.34149	5.02736	5.54652	5.14428	70.2863	35.3187	127.085	118.627	37.4087	37.7756	0.502497	0.933448	1.8081	3.35877	1.85762	1.00981	0.000204238	0.601358	0.000681801	1.02094e-06	0.00551461	0.927306	0.00316717	0.741181	0.00482923	0.00030387	0.0317073	0.986129	-1	0	1	1	1	0
An15g06810	An00g07773	strong similarity to cytochrome-b5 reductase Mcr1 - Saccharomyces cerevisiae	4.9613	4.8104	6.75584	5.18073	12.588	12.4144	11.5396	11.7844	4.94212	4.75449	4.95668	4.74688	4.82986	4.74846	29.5656	62.6085	5797.42	3240.43	29.5366	27.3803	2.11761	0.558943	196.087	51.7569	0.263949	0.926996	0.00954844	0.0337975	1.23474e-10	3.03748e-09	0.00231037	0.70723	0.0530119	0.0980287	1.4394e-07	3.26857e-06	0.016842	0.937998	0	0	1	1	-1	0
An11g07270	An00g07964	strong similarity to D-mandelate dehydrogenase D-MDH - Rhodotorula graminis	4.93187	4.78946	4.81748	4.54781	5.58373	5.51785	5.16964	5.14742	4.83251	4.79775	4.92025	4.86581	4.8951	5.13754	29.0539	25.6813	46.8764	35.7168	28.8434	31.2579	0.883919	0.761935	1.61343	1.39077	0.861996	1.08371	0.143801	0.00510456	6.91933e-05	0.00139597	0.20761	0.235407	0.342813	0.0231392	0.000920976	0.0431022	0.437849	0.73563	0	-1	1	1	0	0
An16g06800	An00g08056	strong similarity to endoglucanase eglB - Aspergillus niger	6.6681	5.88982	6.29827	5.90484	8.35073	8.07625	8.54516	8.56756	6.82264	6.69421	7.10463	7.28043	7.21004	8.02647	77.6524	68.6676	296.829	376.462	117.281	181.729	0.884294	1.26828	3.82254	5.48238	1.43423	1.54952	0.554093	0.262791	3.12208e-05	3.20094e-06	0.23148	0.0217054	0.751377	0.429812	0.000521801	0.000710762	0.468485	0.356212	0	0	1	1	0	0
An14g02670	An00g08059	strong similarity to endoglucanase IV egl4 - Trichoderma reesei	4.14174	4.1774	4.18773	4.11406	4.9953	4.74485	4.94865	4.70529	4.27036	4.33448	4.3237	4.25765	4.20738	4.12471	17.8713	17.7641	29.2442	28.3834	19.8287	18.3357	0.994005	0.970564	1.63638	1.59779	0.976417	0.924706	0.934274	0.683059	2.19605e-05	3.47463e-05	0.817156	0.205097	0.971373	0.804726	0.000416833	0.00402651	0.922471	0.709821	0	0	1	1	0	0
An13g03040	An00g08075	strong similarity to enniatin synthase esyn1 - Fusarium scirpi	4.02149	3.8901	3.59559	3.51569	9.37956	10.4479	4.85727	7.68583	3.53464	3.56578	3.36241	3.36467	3.43415	3.46506	15.5172	11.7586	964.571	77.2546	11.217	10.713	0.757777	0.0800922	62.1615	6.57007	0.105694	0.955072	0.544703	0.000126196	1.21034e-06	0.0013032	0.00414143	0.901361	0.742721	0.00132237	8.25923e-05	0.0409675	0.025703	0.981518	0	-1	1	1	-1	0
An13g02940	An00g08082	strong similarity to enoyl reductase of the lovastatin biosynthesis lovC - Aspergillus terreus	3.80565	3.738	4.12174	4.17828	9.12642	10.7664	6.1804	8.23098	3.60889	3.43763	3.39332	3.67193	3.59357	3.57542	13.6594	17.7532	986.668	147.615	11.1575	12.2409	1.2997	0.149609	72.2334	8.31481	0.11511	1.0971	0.511293	0.000421632	2.00464e-07	0.00017247	0.00212823	0.774366	0.721088	0.00333609	2.86152e-05	0.0113304	0.0158783	0.956203	0	-1	1	1	-1	0
An09g01880	An00g08090	strong similarity to enoyl reductase of the lovastatin biosynthesis lovC - Aspergillus terreus	3.91502	3.61844	3.40483	3.32626	5.00759	5.0201	4.52285	4.3222	3.34831	3.49265	3.51062	4.20993	3.91999	3.71571	13.6113	10.307	32.3085	21.4443	10.9323	15.4394	0.757238	0.663736	2.37366	2.08057	0.876523	1.41227	0.0202578	0.00204967	3.39784e-06	1.67814e-05	0.38478	0.00164909	0.090829	0.0114646	0.000133944	0.00234616	0.636627	0.0996589	0	-1	1	1	0	0
An02g11830	An00g08471	strong similarity to glutathione transferase homolog Ure2 - Saccharomyces cerevisiae	6.15888	5.99893	6.2095	6.33595	6.61007	6.75804	6.70104	6.6654	6.33107	6.36863	6.42029	6.28811	6.48828	6.41626	67.5978	77.3177	102.825	102.766	82.9016	84.3053	1.14379	0.999421	1.52113	1.32914	0.873781	1.01693	0.0641178	0.993099	4.39888e-05	0.00108853	0.172389	0.759285	0.201787	0.995997	0.000674993	0.036889	0.389777	0.95243	0	0	1	1	0	0
An14g06500	An00g08480	strong similarity to glycerone kinase isoform I dak1p - Schizosaccharomyces pombe	6.40076	6.04562	5.77096	5.66041	6.82601	7.01728	6.26355	6.58587	5.57023	5.48777	5.74838	5.69225	5.79666	6.0329	74.7078	52.5524	121.234	85.9072	48.5745	57.3057	0.703439	0.70861	1.62277	1.6347	1.00735	1.17975	0.0077419	0.00874159	0.0009189	0.000820657	0.962916	0.0892752	0.0458516	0.0354555	0.00606058	0.0314393	0.986541	0.571374	-1	-1	1	1	0	0
An06g00770	An00g08555	strong similarity to HC-toxin efflux pump TOXA - Cochliobolus carbonum	5.18815	5.22762	5.44672	5.41533	8.41979	8.75385	7.9421	7.77528	5.09705	5.09195	5.20246	5.46694	5.58569	5.83188	36.9598	43.1421	384.494	232.114	35.0292	49.4594	1.16727	0.603687	10.403	5.38022	0.517178	1.41195	0.113879	0.000145527	1.8745e-11	7.34431e-10	0.000282498	0.000619688	0.295182	0.00146268	4.70461e-08	1.14155e-06	0.00387058	0.056291	0	-1	1	1	-1	0
An16g06720	An00g08556	strong similarity to HC-toxin peptide synthase HTS - Cochliobolus carbonum	9.3052	8.94758	8.38413	8.41042	9.99858	9.49405	9.84651	9.76721	6.90566	6.82005	6.89678	6.83317	6.67259	6.7797	558.879	337.156	858.882	895.692	117.308	108.52	0.603272	1.04286	1.53679	2.65661	1.72867	0.925086	0.000472432	0.694965	0.00159952	1.12355e-06	0.00327153	0.37965	0.00584337	0.812525	0.00936219	0.000327443	0.0217723	0.829702	-1	0	1	1	1	0
An18g06670	An00g08710	strong similarity to hypothetical 2-hydroxyhepta-2,4-diene-1,7-dioate isomerase BH2000 - Bacillus halodurans	8.16032	7.36341	5.73275	6.2095	8.95177	8.67652	6.72739	7.1274	6.70515	6.56827	6.60634	6.57353	6.78637	6.59873	217.047	62.7318	450.114	121.718	98.81	100.627	0.289024	0.270416	2.0738	1.94029	0.935618	1.01839	8.9285e-06	5.38367e-06	0.000889798	0.00178499	0.778605	0.893774	0.000343134	0.000146237	0.00590203	0.049446	0.902096	0.979742	-1	-1	1	1	0	0
An14g01820	An00g08735	strong similarity to hypothetical cell wall protein binB - Aspergillus nidulans	7.24767	5.72243	5.18516	4.67347	10.7191	10.4774	10.0515	9.63917	5.47665	5.99415	5.1863	4.52543	4.68511	5.13361	89.5768	30.4699	1550.2	919.896	46.9277	27.5004	0.340154	0.593404	17.3059	30.1903	1.74451	0.586018	0.00323156	0.0986838	6.88332e-07	1.07839e-07	0.201391	0.0447285	0.0239567	0.213128	5.71122e-05	5.58724e-05	0.429387	0.461436	-1	0	1	1	0	0
An01g12240	An00g08867	strong similarity to hypothetical protein CAC28784.2 - Neurospora crassa	5.80839	4.96379	4.572	4.65722	7.59274	7.77706	6.86414	6.34605	4.61428	4.62536	4.48936	4.36023	4.20428	4.29086	41.819	24.4983	205.772	97.3493	23.8569	19.4962	0.585816	0.473093	4.92053	3.97372	0.80758	0.817215	0.00555917	0.000527928	4.84485e-07	2.09153e-06	0.354946	0.142096	0.0363059	0.00396201	4.48838e-05	0.000531971	0.607852	0.644203	-1	-1	1	1	0	0
An11g03450	An00g09058	strong similarity to hypothetical protein dag11 - Agaricus bisporus	4.42956	4.52186	4.64944	4.66173	7.03078	7.39035	7.19908	5.67147	4.08517	4.14357	4.141	4.16412	4.08868	4.08932	22.2497	25.204	148.114	86.5388	17.4269	17.3161	1.13278	0.584271	6.65691	3.43353	0.515784	0.993642	0.603588	0.0412177	4.66061e-06	0.000233521	0.0693704	0.973886	0.78545	0.113302	0.000159018	0.013981	0.208245	0.995002	0	0	1	1	0	0
An14g04040	An00g09148	strong similarity to hypothetical protein SPAC1093.01 with conserved domain PF01535 duf17p - Schizosaccharomyces pombe	8.20398	8.44844	8.24211	7.98065	9.46056	9.71849	9.0409	9.04014	7.1548	7.63103	7.48016	7.50151	7.56213	7.59357	320.95	276.547	770.434	526.584	171.492	187.715	0.861649	0.68349	2.40048	1.90414	0.793235	1.0946	0.186365	0.00401606	3.88995e-06	6.9649e-05	0.149264	0.317475	0.403946	0.0192531	0.000143579	0.00632675	0.353183	0.799744	0	-1	1	1	0	0
An11g09970	An00g09356	strong similarity to hypothetical protein YMR002w - Saccharomyces cerevisiae	9.23115	9.12318	8.95428	8.62713	10.3197	10.3524	9.93649	9.83163	9.40186	9.45679	9.39076	9.25629	9.34679	9.34205	578.897	442.86	1292.6	944.928	683.346	636.952	0.765007	0.731029	2.23287	2.13369	0.955585	0.932108	0.00280012	0.000921041	1.49013e-07	2.73785e-07	0.657348	0.246898	0.0213233	0.00612961	2.3688e-05	0.000132068	0.835284	0.743243	-1	-1	1	1	0	0
An01g06280	An00g09446	strong similarity to IgE-binding protein - Aspergillus fumigatus	6.04678	5.78053	5.97482	5.72854	9.24104	8.99001	9.50881	8.69239	5.78247	6.09753	5.84813	5.69171	5.72936	5.7629	60.2819	57.7473	554.685	548.976	60.1034	53.0026	0.957954	0.989708	9.20152	9.50652	1.03315	0.881856	0.780092	0.946298	9.29069e-09	7.93334e-09	0.880713	0.32675	0.889889	0.970795	3.16994e-06	6.93622e-06	0.95108	0.8029	0	0	1	1	0	0
An10g01040	An00g09448	strong similarity to hypothetical IgE-binding protein - Aspergillus fumigatus	3.44742	3.45025	3.60489	3.62571	4.22365	3.91226	4.42391	4.10544	3.59472	3.47286	3.48191	3.5176	3.4714	3.48257	10.9195	12.255	16.7717	19.2218	11.4438	11.2396	1.12231	1.14609	1.53594	1.56849	1.02119	0.982158	0.180292	0.118828	0.000224211	0.000150029	0.857669	0.789871	0.395704	0.243558	0.00209799	0.0104938	0.940584	0.95816	0	0	1	1	0	0
An01g09270	An00g09496	strong similarity to isocitrate lyase acuD - Aspergillus nidulans	7.58663	6.40672	6.53509	6.15988	8.59983	8.61327	8.05149	8.09301	5.39399	6.32028	5.78796	4.62107	4.89397	4.31057	127.705	81.4296	389.79	269.148	57.0468	24.3954	0.637637	0.690494	3.05226	3.30528	1.0829	0.427638	0.0923621	0.157684	0.000758095	0.00044331	0.822164	0.00127719	0.256467	0.298935	0.00521386	0.0211654	0.924675	0.083881	0	0	1	1	0	0
An14g02940	An00g09607	strong similarity to FAD dependent L-sorbose dehydrogenase - Gluconobacter oxydans	5.29583	4.43709	4.43335	4.35846	7.43337	6.82252	5.4023	5.49875	4.66615	4.47042	4.56578	4.26028	4.45931	4.27163	29.1709	21.0523	139.87	43.7291	23.7104	20.1179	0.721689	0.312641	4.79485	2.07717	0.433208	0.848482	0.0745796	1.93687e-05	1.04079e-06	0.000988127	0.00426396	0.25037	0.223084	0.000347727	7.50498e-05	0.0353527	0.026273	0.747098	0	-1	1	1	-1	0
An16g01880	An00g09618	strong similarity to lysophospholipase - Aspergillus foetidus	11.2462	9.43096	5.13911	4.97417	12.9875	12.655	9.19377	7.63199	5.23075	5.15412	5.38032	7.20087	7.18531	4.79316	1294.84	33.2813	7237.19	340.824	38.1884	84.0464	0.0257031	0.0470934	5.58926	10.2407	1.83221	2.20084	2.54484e-05	0.000128203	0.00822968	0.0011347	0.442965	0.0995395	0.000732506	0.00133638	0.034101	0.0380065	0.688592	0.590024	-1	-1	1	1	0	0
An08g07380	An00g09651	strong similarity to malonyl CoA synthase matB - Rhizobium trifolii	5.5733	5.55615	5.27326	5.06962	7.43717	7.61379	5.61287	6.13816	5.5353	5.6474	5.50026	5.43023	5.48111	5.69017	47.3315	36.0379	184.245	58.7092	47.2089	46.3289	0.761394	0.318648	3.89265	1.6291	0.418506	0.981359	0.0261785	2.80241e-07	4.55226e-08	0.000737059	0.000110077	0.832786	0.107868	2.14372e-05	9.15101e-06	0.0293866	0.0021115	0.97017	0	-1	1	1	-1	0
An02g07610	An00g09659	strong similarity to mannitol transporter mat1 - Apium graveolens	10.1971	9.27087	6.49552	6.20612	11.5993	11.374	7.68511	7.93949	6.4999	6.17941	6.32156	6.6641	6.288	6.98473	851.575	81.6182	2869.57	224.769	80.6511	100.122	0.0958438	0.0783284	3.36973	2.75391	0.817251	1.24142	7.0336e-08	2.91887e-08	4.84273e-05	0.00023401	0.471885	0.1938	1.26764e-05	5.91769e-06	0.000713856	0.013981	0.711565	0.698009	-1	-1	1	1	0	0
An02g02150	An00g09685	strong similarity to hypothetical Medusa medA - Aspergillus nidulans [truncated ORF]	6.96759	6.95883	6.52457	6.46512	7.96143	7.61031	7.6922	7.19457	5.58399	5.41174	5.69764	5.6105	5.39254	5.5661	124.777	90.1867	220.689	174.053	47.3226	45.9834	0.722782	0.788679	1.76866	1.92992	1.09117	0.971702	0.0145171	0.0581358	0.000332749	0.000100393	0.59457	0.760663	0.0716323	0.145355	0.00280749	0.00821286	0.799372	0.952865	0	0	1	1	0	0
An13g03060	An00g09892	strong similarity to ATP-binding cassette multidrug transport protein atrB - Aspergillus nidulans	4.3131	4.59631	4.72212	4.80587	6.50503	5.98908	8.62825	9.0173	4.39683	4.48317	4.2445	4.36065	4.46827	4.57281	21.928	27.1711	75.9541	452.813	20.7471	22.1195	1.2391	5.96167	3.46379	16.6653	4.81128	1.06615	0.104552	9.84803e-09	4.58061e-07	6.65069e-11	1.43443e-06	0.531358	0.279386	3.62453e-06	4.39539e-05	3.10122e-07	0.000198676	0.887755	0	1	1	1	1	0
An02g06180	An00g10031	strong similarity to nitrogen assimilation regulatory protein nit-4 - Neurospora crassa	3.32146	3.27696	3.41141	3.43232	3.80827	3.81507	3.85869	3.8979	3.50888	3.53105	3.57086	3.5939	3.5264	3.42427	9.84378	10.7173	14.0419	14.7056	11.607	11.4308	1.08874	1.04727	1.42648	1.37214	0.96191	0.984817	0.12697	0.389562	2.27096e-05	6.51962e-05	0.605014	0.72329	0.316257	0.560291	0.000425851	0.00615235	0.805745	0.944427	0	0	1	1	0	0
An12g07400	An00g10361	strong similarity to polyamine transport protein Tpo1 - Saccharomyces cerevisiae	5.16673	5.22128	5.23457	5.31347	7.76994	7.96308	7.1876	7.52206	5.35609	5.33758	5.42808	5.57019	5.39125	5.52356	36.6058	38.6935	233.376	163.691	41.4677	45.0982	1.05703	0.701406	6.37537	4.23045	0.663562	1.08755	0.49394	0.000808366	5.35897e-11	8.55379e-10	0.00335481	0.216132	0.707311	0.0055216	7.49666e-08	1.19659e-06	0.0221507	0.717882	0	-1	1	1	-1	0
An11g07310	An00g10387	strong similarity to polyketide synthase PKS1 - Colletotrichum lagenarium	4.07921	4.10504	4.05507	3.72118	10.4168	10.5213	7.91292	9.25718	3.60647	3.44925	3.60706	3.57092	3.68354	3.49744	17.0551	14.8061	1417.41	384.024	11.7473	11.9917	0.868138	0.270933	83.108	25.9368	0.312086	1.0208	0.514746	5.79427e-05	1.94396e-10	5.58344e-09	0.00227682	0.90664	0.722898	0.000751214	1.81294e-07	5.57905e-06	0.0166408	0.982057	0	-1	1	1	-1	0
An08g03360	An00g10666	strong similarity to protein kinase kin1p - Schizosaccharomyces pombe	7.18481	7.13167	7.01568	6.89486	8.39778	8.14986	7.45136	7.55747	7.25639	7.42952	7.16586	7.03782	7.28094	7.29591	142.839	124.092	309.505	181.574	155.84	147.533	0.868759	0.586658	2.16682	1.46321	0.675283	0.946693	0.12204	4.84915e-05	1.3687e-06	0.000806581	0.00683765	0.441862	0.308384	0.000665414	8.72277e-05	0.0311692	0.0371031	0.855706	0	-1	1	1	-1	0
An08g05230	An00g10740	strong similarity to hypothetical endoglucanase IV - Trichoderma reesei	4.53378	4.04046	3.76245	3.92892	6.65698	6.35899	6.15574	4.60036	3.82904	4.06165	3.71539	4.14127	4.01892	3.86763	19.5232	14.3769	91.0119	41.5867	14.6081	16.1032	0.736403	0.456937	4.66173	2.8926	0.620498	1.10235	0.254517	0.0102746	7.43815e-05	0.00147373	0.211661	0.648555	0.487677	0.0400254	0.000967928	0.0438638	0.442789	0.921641	0	-1	1	1	0	0
An11g07340	An00g10749	strong similarity to hypothetical O-methyl transferase EncK - Streptomyces maritimus	5.96417	5.40326	5.8327	4.3252	12.0098	12.1084	9.6976	10.283	4.04492	3.70296	3.7688	3.91375	3.5027	4.0249	51.4007	33.7999	4267.28	1017.16	14.3094	14.0625	0.657578	0.238362	83.0199	30.0934	0.362485	0.982746	0.149136	0.00022994	3.1566e-09	5.26094e-08	0.0221068	0.938642	0.350574	0.00207927	1.37993e-06	3.50454e-05	0.0889678	0.988627	0	-1	1	1	0	0
An02g01550	An00g10967	strong similarity to secreted serine protease 19 kDa CS antigen CS-Ag - Coccidioides immitis	7.578	6.51868	5.36123	5.1505	10.3347	11.0219	9.38696	8.98345	6.18115	6.35933	6.11116	7.01075	6.71746	7.86431	132.361	38.2097	1638.64	582.132	74.3992	146.779	0.288677	0.355252	12.3801	15.2352	1.23062	1.97286	0.000655134	0.00246798	1.07293e-06	4.77057e-07	0.593851	0.00956447	0.00747578	0.0132227	7.60005e-05	0.00018001	0.798769	0.252472	-1	-1	1	1	0	0
An16g07150	An00g11070	strong similarity to soluble cytoplasmic fumarate reductase YEL047c - Saccharomyces cerevisiae	8.85797	7.65838	6.23281	5.91628	10.6645	9.83166	7.42696	7.38425	7.70836	7.62481	7.64214	7.72141	7.72543	7.49032	306.167	67.3939	1216.14	169.555	202.032	200.258	0.220121	0.139421	3.97214	2.51588	0.633381	0.991222	2.87862e-05	2.2758e-06	6.67839e-05	0.00168589	0.1794	0.962666	0.000802173	8.37104e-05	0.000897445	0.0480657	0.399902	0.992112	-1	-1	1	1	0	0
An18g01050	An00g11131	strong similarity to subunit lsdB of lignostilbene-alpha,beta-dioxygenase isozyme LSD-III - Pseudomonas paucimobilis	4.25961	4.07285	4.00641	4.07158	5.90523	5.08163	4.72861	5.50697	4.38822	4.13917	4.19652	4.11471	4.24464	4.24204	17.9539	16.4384	45.0492	34.7223	18.9129	18.3851	0.915585	0.770765	2.50915	2.11228	0.841829	0.972088	0.630473	0.171549	0.000285629	0.00141099	0.508629	0.849336	0.803626	0.316847	0.00250826	0.0431885	0.73949	0.97269	0	0	1	1	0	0
An01g00200	An00g11170	strong similarity to succinyl-CoA:3-ketoacid-CoA transferase SCOT - Homo sapiens	6.33514	5.87834	6.01851	6.13694	10.7736	8.56367	8.37368	8.70837	6.29196	6.43531	6.23707	6.59126	6.4748	7.32517	68.9148	67.5427	813.867	372.481	79.9734	111.205	0.98009	0.457668	11.8098	5.51475	0.466966	1.39052	0.956711	0.0532945	2.49271e-05	0.000587881	0.1646	0.288276	0.982399	0.13672	0.000450005	0.0254609	0.377102	0.782934	0	0	1	1	0	0
An02g06440	An00g11245	strong similarity to molasses resistency protein Rtm1 - Saccharomyces cerevisiae	4.95395	4.99046	5.72276	5.85773	6.09588	5.6966	6.75827	6.1809	5.16415	5.19407	5.19126	5.36866	5.26762	5.41905	31.3894	55.3397	59.5586	88.6215	36.3318	40.8362	1.76301	1.48797	1.89741	1.60141	0.843997	1.12398	0.000415005	0.00518819	0.000151798	0.00168371	0.319335	0.238926	0.00529216	0.0234348	0.00158423	0.0480657	0.568912	0.739504	1	1	1	1	0	0
An15g06280	An00g11290	strong similarity to aspartic proteinase aspergillopepsin I pepA - Aspergillus niger [truncated ORF]	8.3686	7.81359	6.27304	6.57208	9.89311	9.39175	8.50928	7.88161	7.58249	7.55625	7.50714	6.92353	6.97766	6.16541	272.685	85.7794	799.212	293.14	187.225	103.169	0.314573	0.366786	2.9309	3.41736	1.16598	0.551044	0.000128366	0.00041841	0.000237439	7.56416e-05	0.604621	0.004124	0.00229045	0.00331811	0.00218092	0.00678302	0.805528	0.171698	-1	-1	1	1	0	0
An02g02340	An00g11310	strong similarity to chitin synthase with a myosin motor-like domain csmA - Aspergillus nidulans	8.78474	8.7918	8.08591	7.91719	9.23703	9.06118	8.8942	8.7851	7.75281	7.93395	7.88731	8.01481	7.93627	8.04955	442.114	256.276	567.747	458.142	232.007	256.037	0.57966	0.806947	1.28417	1.78769	1.3921	1.10357	4.24701e-06	0.00780006	0.00299479	2.27002e-06	0.00461503	0.096106	0.000203464	0.0324554	0.0154934	0.000567059	0.0278755	0.585335	-1	-1	1	1	1	0
An18g03170	An00g11330	strong similarity to cyclin-dependent protein kinase Pho85 - Saccharomyces cerevisiae	5.60017	5.51148	5.23443	5.46285	6.48758	6.45794	6.03178	5.89571	5.70774	5.71774	5.48854	5.64975	5.72548	5.69488	47.0403	40.7476	88.8169	62.4116	49.7977	51.6264	0.866227	0.7027	1.8881	1.53166	0.811219	1.03672	0.068866	0.000406104	1.89081e-06	8.26764e-05	0.0619902	0.54871	0.211311	0.00325185	0.000106656	0.00732	0.191769	0.893549	0	-1	1	1	0	0
An03g00500	An00g11346	strong similarity to diglycosidase related protein SEQ ID NO:10 from patent WO200018931-A1 - Aspergillus fumigatus	8.27866	8.01024	6.97681	7.35793	9.90469	9.10076	8.07627	8.05765	5.91607	6.07352	5.80959	5.88572	5.7789	5.99576	282.959	143.745	725.448	268.162	61.0982	59.1699	0.508008	0.369651	2.56379	1.86554	0.727647	0.968438	0.000838821	3.29582e-05	5.45263e-05	0.00153946	0.162711	0.798878	0.0089438	0.000510192	0.000780725	0.0454336	0.373878	0.960177	-1	-1	1	1	0	0
An13g01800	An00g11455	strong similarity to hypothetical protein encoded by An15g07140 - Aspergillus niger	5.11039	4.38883	5.07884	4.89591	9.3415	7.66683	9.8315	10.3734	6.90756	7.10223	6.78495	8.45872	8.59141	6.78494	26.9014	31.7211	363.084	1099.37	122.071	246.428	1.17916	3.02787	13.4968	34.6574	2.56782	2.01872	0.694527	0.0198699	4.66482e-05	2.44836e-06	0.130508	0.0585348	0.841846	0.0659625	0.000702013	0.000590519	0.324218	0.505062	0	0	1	1	0	0
An02g03380	An00g11516	strong similarity to hypothetical protein EAA61757.1 - Aspergillus nidulans	4.17334	4.27868	4.70053	3.99042	6.32744	6.65424	6.57945	6.3508	4.07739	4.24353	4.3668	4.4214	4.26591	4.48782	18.7135	20.3291	89.9368	88.348	18.7555	20.9911	1.08633	0.982334	4.80598	4.34589	0.904267	1.1192	0.560372	0.899519	1.51346e-07	3.02222e-07	0.616107	0.338544	0.755207	0.942478	2.37886e-05	0.00013638	0.813251	0.808587	0	0	1	1	0	0
An15g02860	An00g11648	strong similarity to peroxisomal 2,4-dienoyl-CoA reductase involved in sporulation Sps19 - Saccharomyces cerevisiae [putative sequencing error]	5.99601	5.06099	4.46103	4.37526	7.79452	7.80397	5.464	6.08774	6.28739	5.81103	6.10773	5.44749	5.74378	5.27274	46.1578	21.3794	222.744	54.7911	67.1222	44.8801	0.46318	0.245982	4.82571	2.5628	0.531073	0.668634	0.00225289	1.59244e-05	5.26153e-06	0.000511711	0.0428394	0.0283068	0.0181229	0.000305592	0.000170774	0.0231676	0.146564	0.389749	-1	-1	1	1	0	0
An03g06500	An00g12152	strong similarity to zeaxanthin epoxidase ABA2 - Nicotiana plumbaginifolia	3.04933	3.02299	3.41418	3.26476	5.49801	5.35404	4.10658	4.72828	3.26289	3.2662	3.19337	3.31511	3.28778	3.18181	8.20305	10.1223	42.9929	21.3688	9.45331	9.59026	1.23397	0.49703	5.24109	2.11106	0.402789	1.01449	0.0755971	3.82259e-05	5.88185e-09	2.06885e-05	8.09135e-05	0.872725	0.225006	0.00056348	2.06842e-06	0.00273029	0.00173604	0.975547	0	-1	1	1	-1	0
An04g05360	An00g12436	weak similarity to dentin sialophosphoprotein from patent WO200062065-A1 - Homo sapiens	5.61928	5.6953	6.28986	6.06974	8.94574	9.1789	8.36646	8.06459	5.24999	5.59873	5.46437	4.78813	5.46715	5.29476	50.4678	72.4946	534.6	297.248	43.3421	36.3365	1.43645	0.556019	10.5929	4.10028	0.387078	0.838365	0.0238268	0.00132996	2.02256e-09	4.88983e-07	0.000481888	0.147463	0.101317	0.00816001	1.08821e-06	0.00018001	0.00559529	0.65055	0	-1	1	1	-1	0
An16g07260	An00g12498	weak similarity to epithelial microtubule-associated protein E-MAP-115 - Homo sapiens	6.24455	6.55752	4.99486	5.29969	7.0753	6.82581	6.28856	5.77055	5.07374	4.95616	5.20665	5.21107	5.36974	5.15472	84.5089	35.4392	123.687	65.3246	33.7977	37.9276	0.419355	0.528143	1.4636	1.84329	1.25942	1.1222	1.87576e-05	0.000284531	0.0101614	0.000402878	0.213471	0.277337	0.000581817	0.00245395	0.0402495	0.0198163	0.445442	0.771375	-1	-1	1	1	0	0
An12g10210	An00g12554	similarity to hypothetical protein CAD21295.1 - Neurospora crassa	7.71038	7.25239	6.69783	5.92415	9.56545	8.94214	9.54667	9.38262	7.44889	7.52528	7.32222	7.27478	7.0809	7.41148	178.699	79.3958	610.477	706.549	172.7	152.824	0.4443	1.15737	3.41624	8.89907	2.60493	0.884905	0.000701183	0.423872	2.00491e-05	6.0317e-08	0.00258799	0.412872	0.00784081	0.591476	0.000391027	3.83534e-05	0.0181927	0.844397	-1	0	1	1	1	0
An11g09820	An00g12570	weak similarity to filamentous hemagglutinin fhaB - Bortedella pertussis	5.51316	5.03167	5.14011	5.25469	6.90193	6.54811	6.25131	6.00115	5.57639	5.56949	5.54373	5.74345	5.59761	5.57306	38.6504	36.6923	105.787	69.8519	47.2814	49.7988	0.949337	0.660305	2.73703	1.90372	0.695544	1.05324	0.641165	0.00268253	1.24283e-06	8.73618e-05	0.0368932	0.569943	0.810597	0.0141394	8.35866e-05	0.00756278	0.130669	0.899975	0	-1	1	1	0	0
An06g00160	An00g12646	weak similarity to hypothetical cell wall protein binB - Aspergillus nidulans	5.22598	5.03371	4.87576	4.73499	10.3267	9.61339	9.247	7.32569	4.86835	5.03328	4.70895	5.19655	4.69827	5.07084	35.0136	27.9616	1002.94	312.204	29.2465	31.7471	0.798592	0.311288	28.6444	11.1655	0.389796	1.0855	0.491292	0.00338512	3.12359e-07	8.53155e-06	0.0581628	0.756433	0.705157	0.0168461	3.36122e-05	0.00136903	0.182676	0.952312	0	-1	1	1	0	0
An04g06640	An00g12738	weak similarity to hypothetical protein encoded by An08g02420 - Aspergillus niger	8.79889	8.54145	8.26991	8.12936	9.14302	8.97505	9.14311	8.80184	8.53572	8.75757	8.56334	8.72605	8.6952	8.63102	407.362	293.992	533.385	502.325	393.134	411.313	0.721699	0.941768	1.30937	1.70863	1.30493	1.04624	0.00397162	0.520953	0.012235	8.93132e-05	0.0611872	0.553094	0.0281454	0.676371	0.0463962	0.00761831	0.189705	0.895935	-1	0	1	1	0	0
An18g03730	An00g12828	weak similarity to hypothetical protein CG2779 - Drosophila melanogaster	11.1161	10.9725	10.219	10.1803	11.7582	11.536	11.4289	11.1083	10.3135	10.1504	10.463	10.337	10.3409	10.3108	2111.87	1175.99	3207.18	2467.16	1268.57	1286.8	0.556847	0.769262	1.51864	2.09795	1.38146	1.01437	2.9588e-05	0.0117897	0.000531601	3.10134e-06	0.0237334	0.845294	0.000813177	0.0444424	0.00400677	0.000699752	0.0934178	0.972205	-1	-1	1	1	0	0
An12g10200	An00g13029	weak similarity to ice nucleation gene inaX - Xanthomonas campestris	10.2943	9.71728	8.66751	8.16988	11.5893	11.3367	11.7148	11.6687	9.86621	10.0554	9.72632	9.48898	9.25175	9.85315	1028.1	342.199	2822.94	3308.01	944.012	739.954	0.332846	1.17183	2.74579	9.66691	3.52063	0.78384	2.3146e-05	0.342902	5.05702e-05	1.46551e-08	0.000153318	0.088698	0.000683101	0.515126	0.000739213	1.20594e-05	0.00261574	0.569766	-1	0	1	1	1	0
An12g00140	An00g13165	weak similarity to mucin-like protein Muc1 - Saccharomyces cerevisiae	6.40231	5.40369	4.56887	5.05115	7.9616	7.53563	7.10285	7.42276	5.48193	5.05976	5.30528	5.78182	5.75336	6.15982	59.8384	28.0516	215.063	153.575	38.917	59.6452	0.468789	0.714095	3.59406	5.47475	1.52328	1.53263	0.00338056	0.128257	5.60489e-05	3.83155e-06	0.174127	0.0265321	0.024842	0.257785	0.000795012	0.000799993	0.392036	0.383883	-1	0	1	1	0	0
An09g00480	An00g13211	similarity to BCU0021 protein SEQ ID 8 from patent WO2003029421-A2 - Homo sapiens.	5.23364	4.98023	5.14095	5.15899	5.87344	5.87374	6.7803	6.67366	5.12024	5.17638	4.96447	4.71406	4.94391	5.00043	34.462	35.5055	58.6309	105.931	33.9898	29.5714	1.03028	1.80674	1.70132	2.9835	1.75364	0.870009	0.717323	1.20399e-05	3.28013e-05	2.26126e-08	0.000402885	0.0566094	0.854957	0.000252881	0.000540654	1.75737e-05	0.00488385	0.497278	0	1	1	1	1	0
An08g05010	An00g13271	similarity to hypothetical pathogenesis-related protein CAD27313.1 - Aspergillus fumigatus	9.14239	8.92242	8.64479	8.79872	9.8096	9.27417	9.59298	9.41281	8.74316	8.65978	8.71395	8.47168	8.50241	8.68746	523.63	422.192	745.406	725.533	417.5	375.808	0.806279	0.973339	1.42354	1.71849	1.2072	0.900139	0.0687961	0.805335	0.00684617	0.00033611	0.238919	0.25351	0.211236	0.882409	0.0293795	0.0176503	0.478009	0.751187	0	0	1	1	0	0
An14g01070	An00g13322	strong similarity to hypothetical protein EAA61306.1 - Aspergillus nidulans	7.57162	7.62721	7.11048	7.18811	7.98607	8.1968	8.12083	7.63708	6.55346	6.84376	6.69684	6.59245	6.52772	6.59555	193.933	141.955	272.75	235.398	103.826	95.1353	0.73198	0.863053	1.40641	1.65825	1.17907	0.9163	0.00910655	0.16566	0.00537909	0.000318633	0.265294	0.303832	0.0513603	0.309196	0.0242763	0.0170128	0.508004	0.79402	0	0	1	1	0	0
An09g04550	An00g13379	weak similarity to protein phosphatase type 1 Gac1 - Saccharomyces cerevisiae [truncated ORF]	5.26378	5.65366	4.28768	4.64946	6.31034	6.39003	5.52929	5.17973	4.20185	3.94382	4.13233	3.98942	4.05312	4.08831	43.9783	22.1398	81.5825	40.9136	17.0614	16.4911	0.503425	0.5015	1.85506	1.84797	0.996176	0.966571	6.0222e-05	5.72969e-05	0.000150603	0.000158787	0.98095	0.714445	0.0013566	0.000745606	0.00157576	0.0107829	0.991726	0.94047	-1	-1	1	1	0	0
An13g03050	An00g13643	weak similarity to hypothetical protein encoded by An04g04070 - Aspergillus niger	5.30126	5.25579	4.97669	4.83589	8.9404	9.65881	7.44659	8.0589	3.87305	4.31839	4.16643	3.91826	3.9947	4.07795	38.8146	29.9875	630.172	215.68	17.3792	15.9665	0.772584	0.342255	16.2355	7.19231	0.443	0.91871	0.137742	3.1747e-05	1.71572e-09	7.14403e-08	0.00424568	0.533188	0.333731	0.000498146	9.74229e-07	4.34512e-05	0.0261873	0.889271	0	-1	1	1	-1	0
An09g00630	An00g13692	strong similarity to hypothetical cipC - Aspergillus nidulans	6.14444	5.95627	6.19457	5.62851	8.31801	8.23167	9.03591	8.92753	6.84127	6.45997	6.73702	6.39017	6.39708	6.54493	66.2731	60.1937	309.725	505.554	102.496	87.0673	0.908267	1.63227	4.67346	8.39878	1.79712	0.849474	0.429023	0.00144836	3.26667e-08	9.88713e-10	0.00448051	0.115761	0.657566	0.00871972	7.37055e-06	1.25737e-06	0.0273702	0.616772	0	1	1	1	1	0
An12g09020	An00g13903	similarity to hypothetical protein CAD79668.1 - Neurospora crassa	6.21143	6.32359	5.82886	5.92882	6.60013	6.46355	6.41234	6.62009	5.17028	5.16355	5.19485	5.0816	5.08206	5.0386	77.0387	58.8445	92.5295	91.5327	36.1576	33.5309	0.763831	0.989227	1.20108	1.5555	1.29509	0.927353	0.000982299	0.86258	0.0118144	1.44212e-05	0.0119474	0.158383	0.0100669	0.919853	0.0451564	0.00207978	0.0558783	0.663148	-1	0	1	1	0	0
An16g00670	An00g13923	similarity to hypothetical protein AAO51454.1 - Dictyostelium discoideum	7.97843	7.14692	5.26516	5.1238	12.8122	12.6473	9.8113	8.64662	4.90158	4.55899	4.8092	4.93286	4.93544	4.80164	189.057	36.6179	6792.55	600.059	27.0319	29.6504	0.193687	0.0883408	35.9285	16.387	0.456101	1.09687	1.1689e-05	2.32607e-07	3.62392e-09	5.21613e-08	0.0290898	0.620258	0.000415021	1.97307e-05	1.44843e-06	3.50454e-05	0.108807	0.912194	-1	-1	1	1	0	0

## Sheet: 03.04 DOWN
ORF	alias	annotation	061018MJA_ANIGERa_AR01.CEL	061018MJA_ANIGERa_AR07.CEL	061018MJA_ANIGERa_AR02.CEL	061018MJA_ANIGERa_AR08.CEL	061018MJA_ANIGERa_AR03.CEL	061018MJA_ANIGERa_AR05.CEL	061018MJA_ANIGERa_AR04.CEL	061018MJA_ANIGERa_AR06.CEL	080805MJA_ANIGERa_100480-01.CEL	080805MJA_ANIGERa_100480-02.CEL	080805MJA_ANIGERa_100480-06.CEL	080807MJA_ANIGERa_100480-20.CEL	080807MJA_ANIGERa_100480-21.CEL	080807MJA_ANIGERa_100480-22.CEL	racA.wt.2	racA.wt.4	racA.G12V.2	racA.G12V.4	wt	racA.D	FC 01	FC 02	FC 03	FC 04	FC 05	FC 06	pValue 01	pValue 02	pValue 03	pValue 04	pValue 05	pValue 06	FDR 01	FDR 02	FDR 03	FDR 04	FDR 05	FDR 06	decide (FDR < 0.05) 01	decide (FDR < 0.05) 02	decide (FDR < 0.05) 03	decide (FDR < 0.05) 04	decide (FDR < 0.05) 05	decide (FDR < 0.05) 06
An01g10970	An00g00073	strong similarity to quinate transporter qa-y - Neurospora crassa	6.19539	6.15572	6.61773	6.6252	5.48953	5.44715	5.94549	6.08483	6.1109	6.17536	6.05471	5.31741	5.36653	5.31296	72.2817	98.4599	44.2725	64.6761	69.2458	40.2886	1.36217	1.46086	0.612499	0.656877	1.07245	0.58182	9.14503e-05	1.42151e-05	1.13672e-06	5.26485e-06	0.364888	4.87836e-08	0.00181204	0.000284893	7.87206e-05	0.0010089	0.616923	6.82434e-05	1	1	-1	-1	0	-1
An08g11130	An00g00420	hypothetical protein	9.16219	9.25918	9.41043	9.4122	8.75289	8.82561	8.41863	8.73273	8.86643	8.74655	8.82454	8.60683	8.70977	8.65828	592.506	680.907	442.414	381.537	449.603	404.023	1.1492	0.862399	0.746683	0.560336	0.750434	0.898621	0.0696116	0.0555831	0.00137119	3.56656e-06	0.0134233	0.0851425	0.212898	0.14081	0.00833146	0.000767579	0.0610264	0.562069	0	0	-1	-1	0	0
An12g02660	An00g00762	hypothetical protein	5.80703	6.34663	8.36755	8.71328	4.34807	4.36304	6.85074	6.33361	5.89937	6.66006	6.02483	6.28036	6.3332	6.18947	67.5007	372.324	20.4717	96.4813	73.2498	77.0477	5.51586	4.71292	0.303281	0.259133	0.854432	1.05185	7.60935e-07	2.02248e-06	2.53855e-05	7.86087e-06	0.5387	0.730701	6.18879e-05	7.83724e-05	0.000454115	0.00132489	0.761353	0.9457	1	1	-1	-1	0	0
An08g10580	An00g01346	hypothetical protein	6.26928	6.00717	5.89242	6.15769	5.48187	5.3529	5.41841	5.54105	5.76408	5.71559	5.87856	5.49778	5.77291	5.67671	70.4351	65.1211	42.7361	44.6234	55.1801	50.1831	0.924554	1.04416	0.606743	0.685238	1.12937	0.909442	0.391147	0.632665	0.000127091	0.00118018	0.348593	0.212426	0.62463	0.765998	0.00140269	0.0388701	0.600971	0.717882	0	0	-1	-1	0	0
An15g02490	An00g03626	similarity to 3-isopropylmalate dehydrogenase leuB - Sulfolobus sp.	9.88613	9.99044	11.1301	11.0184	9.56894	9.40338	10.6306	10.6839	10.4454	10.4499	10.4542	10.5139	10.5019	10.4918	981.121	2156.18	717.163	1614.93	1398.68	1450.7	2.19767	2.25183	0.730963	0.748979	1.02465	1.0372	1.30624e-08	9.40001e-09	0.000123615	0.000244767	0.759976	0.432886	5.04838e-06	3.61214e-06	0.00136885	0.0142224	0.890991	0.852652	1	1	-1	-1	0	0
An05g00130	An00g03938	similarity to cell wall synthesis protein KRE9 - Candida albicans	6.40408	6.42304	6.03813	6.19167	5.85572	5.64584	5.6613	5.72998	6.472	6.43653	6.57949	6.20214	6.2912	6.37243	85.2458	69.3055	53.8466	51.8273	90.2596	78.1726	0.813008	0.962499	0.631663	0.747809	1.18387	0.866086	0.0100405	0.580055	2.38148e-05	0.00111262	0.102088	0.0231373	0.0549519	0.724283	0.000434863	0.0375952	0.273689	0.362417	0	0	-1	-1	0	0
An04g06730	An00g05158	similarity to mannosyltransferases Ttp1 - Saccharomyces cerevisiae	5.44063	5.19616	5.29963	5.33469	4.6284	4.80399	4.49668	4.78011	5.89624	5.95	5.99556	5.68598	5.7655	5.90439	39.9022	39.8679	26.2856	24.9056	61.703	55.1501	0.999141	0.9475	0.65875	0.624702	0.948314	0.8938	0.991853	0.525282	0.00032663	0.000119827	0.656959	0.122036	0.997852	0.680135	0.00277259	0.00921022	0.835091	0.623536	0	0	-1	-1	0	0
An03g06930	An00g05631	similarity to protein involved in cell cycle control rad17p - Schizosaccharomyces pombe	6.24609	6.13559	6.90526	6.94635	5.57014	5.82677	6.38274	6.22843	6.86086	6.95963	7.00522	6.52753	6.63556	6.56082	73.0515	121.584	51.9286	79.099	122.948	95.3152	1.66436	1.52323	0.710849	0.650572	0.915205	0.77525	1.20834e-05	7.0175e-05	0.000411407	5.803e-05	0.384306	0.00083118	0.000426854	0.000851412	0.00328867	0.0057353	0.636248	0.066824	1	1	-1	-1	0	0
An08g01860	An00g05727	strong similarity to ROK1-suppressor SUR1 - Candida albicans	6.15004	6.49788	6.45663	6.53061	5.56632	5.19017	4.91992	5.48195	6.26584	6.55527	6.19775	6.13336	6.27773	5.94436	80.1126	90.1104	41.5922	36.7821	80.9872	69.478	1.1248	0.88435	0.519172	0.408189	0.786231	0.857889	0.419059	0.399045	0.000625354	4.49057e-05	0.249951	0.206939	0.648558	0.568724	0.00452799	0.00489029	0.492607	0.711395	0	0	-1	-1	0	0
An08g07090	An00g05913	similarity to protein Sim1 - Saccharomyces cerevisiae	9.79881	9.76155	7.83807	7.89897	8.91656	8.82109	7.33216	7.15137	7.48643	7.92958	7.50784	7.44843	7.43065	7.40403	879.281	233.701	467.501	151.352	199.644	172.171	0.265786	0.323746	0.531686	0.64763	1.21807	0.862393	1.03415e-08	5.8232e-08	2.00617e-05	0.000511743	0.151038	0.0698475	4.45312e-06	9.36331e-06	0.000391027	0.0231676	0.355283	0.525255	-1	-1	-1	-1	0	0
An11g00090	An00g06205	similarity to hypothetical membrane protein pth - Blumeria graminis	5.54821	5.62577	6.58622	6.43121	5.13392	4.71127	5.77715	5.30428	4.43068	4.48888	4.66278	4.6032	4.70281	4.61853	48.0675	91.0579	30.3283	46.5501	23.062	24.9594	1.89438	1.53487	0.630954	0.511214	0.810224	1.08227	0.000121118	0.00264887	0.00160673	7.90035e-05	0.209616	0.404692	0.00218904	0.0139989	0.00938871	0.00703936	0.440156	0.83983	1	1	-1	-1	0	0
An15g02360	An00g06879	strong similarity to acetylornithine aminotransferase arg8 - Kluyveromyces lactis	7.15607	7.37148	8.33913	8.32195	5.77758	6.15188	7.59414	7.73212	7.97866	8.13478	7.93523	8.18748	8.24353	8.41911	153.679	321.916	62.4544	202.69	258.895	311.562	2.09473	3.24541	0.406396	0.629636	1.54932	1.20343	4.99717e-06	4.20172e-08	6.9451e-07	0.000341782	0.00594046	0.0303674	0.000232792	7.83705e-06	5.71122e-05	0.0177739	0.0334276	0.405353	1	1	-1	-1	1	0
An03g00770	An00g07022	strong similarity to hypothetical allergic bronchopulmonary aspergillosis allergen rAsp f 4 from patent WO9828624-A1 - Aspergillus fumigatus	9.62754	10.1828	11.2864	11.1362	9.18035	8.69052	9.93083	10.0644	10.1431	10.1598	10.3125	9.17042	9.21827	9.03669	958.868	2370.98	489.591	1022.32	1180.46	564.878	2.47268	2.08812	0.510593	0.431183	0.844475	0.478524	1.49846e-05	9.8277e-05	0.000213796	2.9729e-05	0.362058	1.53983e-05	0.000496729	0.00109896	0.00202877	0.0035816	0.61444	0.00468276	1	1	-1	-1	0	-1
An12g02460	An00g07038	strong similarity to alpha-amylase - Aspergillus niger	8.10344	7.92404	8.05828	8.07918	7.32911	7.40342	7.388	7.45766	7.51175	7.85779	7.61172	7.30066	7.34377	7.2224	258.45	268.491	164.994	171.591	202.309	156.383	1.03885	1.03998	0.638398	0.639092	1.00109	0.772991	0.626219	0.616514	9.20195e-05	9.3993e-05	0.992117	0.00153797	0.800958	0.753487	0.00110684	0.00787346	0.997106	0.0954857	0	0	-1	-1	0	0
An02g04880	An00g07130	strong similarity to arginine--tRNA ligase Msr1 - Saccharomyces cerevisiae	9.38119	9.38852	10.3244	10.2029	8.5297	8.61454	9.90934	9.87777	9.88273	9.90963	9.98655	9.89911	9.8924	9.89344	668.534	1229.33	380.597	951.168	973.005	952.108	1.83884	2.49915	0.569301	0.77373	1.35909	0.978524	9.26016e-08	1.13189e-09	2.10429e-07	0.000356454	0.00128993	0.61296	1.47205e-05	1.05513e-06	2.97343e-05	0.0183325	0.0111941	0.911073	1	1	-1	-1	1	0
An15g02340	An00g07132	strong similarity to argininosuccinate synthase Arg1 - Saccharomyces cerevisiae	10.4384	10.3461	11.096	11.0541	9.94423	10.2293	10.5648	10.4441	10.5626	10.4854	10.5781	10.5394	10.5522	10.3988	1343.93	2157.4	1087.48	1452.61	1490.99	1444.96	1.60529	1.33576	0.809177	0.673315	0.832098	0.969131	2.79996e-05	0.00161076	0.0115095	0.000138514	0.0909298	0.595742	0.000789623	0.00945569	0.044391	0.010041	0.252434	0.907202	1	1	-1	-1	0	0
An11g09510	An00g07167	strong similarity to aspartate-semialdehyde dehydrogenase Hom2 - Saccharomyces cerevisiae	7.74716	7.79932	9.55206	9.47337	7.00193	7.48331	8.67438	8.57369	9.03027	9.17096	9.14351	9.21967	9.13274	9.24775	218.765	730.486	151.442	394.543	554.45	588.156	3.33913	2.60524	0.692258	0.54011	0.780215	1.06079	2.43724e-08	2.78656e-07	0.00159528	2.21103e-05	0.0742481	0.434742	6.19901e-06	2.14372e-05	0.00935307	0.00286389	0.218205	0.854074	1	1	-1	-1	0	0
An01g07000	An00g07321	strong similarity to C-14 sterol reductase Erg24 - Saccharomyces cerevisiae	9.00747	8.76436	9.44059	9.21955	8.50016	8.1789	7.43766	7.67073	8.84686	9.09255	8.88911	7.90858	7.98307	8.36846	473.072	643.622	323.929	187.949	492.112	271.857	1.36052	0.580217	0.684734	0.292017	0.426468	0.552429	0.0246001	0.000731437	0.00836054	4.01506e-07	0.000328232	6.65621e-05	0.103967	0.00510448	0.0345308	0.000165196	0.00426336	0.0114955	0	-1	-1	-1	-1	-1
An02g05490	An00g07335	strong similarity to Ca(2+)/calmodulin-dependent protein kinase Cmk2 - Saccharomyces cerevisiae	9.94982	9.81934	9.73017	9.76931	9.50616	9.37717	8.93727	9.21984	9.48396	9.68498	9.56064	9.18092	9.18255	9.2469	945.267	860.92	695.384	540.65	763.524	589.544	0.910769	0.777485	0.735648	0.627991	0.853657	0.772135	0.225121	0.00515589	0.00135822	4.5096e-05	0.152027	0.00108179	0.452717	0.0233341	0.00826094	0.00489029	0.356669	0.0768182	0	-1	-1	-1	0	0
An03g03050	An00g07428	strong similarity to cDNA gene trap ankyrin repeat containing protein Gtar - Mus musculus	7.92328	7.82745	7.63976	7.53277	6.54881	7.12764	6.09785	5.833	6.92367	6.99917	6.89037	6.55046	6.68588	6.862	234.813	192.173	114.422	62.4845	122.593	103.929	0.818408	0.546087	0.48729	0.325147	0.667256	0.84775	0.108502	0.00024288	5.47456e-05	7.32872e-07	0.0296096	0.105559	0.285306	0.00216687	0.000782263	0.00023781	0.110426	0.59857	0	-1	-1	-1	0	0
An01g13290	An00g07512	strong similarity to choline permease Hnm1 - Saccharomyces cerevisiae	11.1675	10.986	10.7472	10.9471	9.99838	10.0454	9.88211	9.80016	10.2675	10.3679	10.3468	9.62714	9.60915	8.80298	2159.87	1842.13	1039.65	917.226	1284.86	650.96	0.852889	0.882242	0.48135	0.497916	1.03442	0.506639	0.312129	0.422087	0.00046008	0.000666192	0.876415	0.000157959	0.550615	0.590163	0.0035578	0.0273323	0.949003	0.021878	0	0	-1	-1	0	-1
An12g01900	An00g08009	strong similarity to dnaJ protein homolog YIR004w - Saccharomyces cerevisiae	8.26284	8.30917	8.49916	8.40225	7.92499	7.93179	7.80102	8.04427	8.27448	8.54077	8.28444	8.08883	8.11207	8.24044	312.13	349.878	243.604	242.635	330.055	283.482	1.12093	0.996022	0.780456	0.693484	0.888564	0.858893	0.163594	0.959421	0.00766347	0.000528418	0.29828	0.0327516	0.371814	0.977914	0.0321163	0.0238453	0.544661	0.416418	0	0	-1	-1	0	0
An16g06300	An00g08251	strong similarity to Fe(II) permease Fet4 - Saccharomyces cerevisiae	9.04275	9.11616	9.5856	9.49858	8.6319	8.16682	8.09974	8.39173	7.87036	7.93274	7.92551	6.66165	6.6387	6.2972	540.989	745.514	337.645	303.539	240.44	92.5728	1.37806	0.898989	0.624125	0.407154	0.65236	0.385014	0.013869	0.354568	0.00122765	4.52614e-06	0.018833	3.16634e-07	0.0692411	0.525505	0.00761067	0.00087939	0.0785962	0.000295293	0	0	-1	-1	0	-1
An03g03560	An00g08261	strong similarity to ferrichrome-type siderophore transporter Arn1 - Saccharomyces cerevisiae	5.55266	6.20165	9.81487	10.2938	4.13977	4.83781	7.96489	8.58117	9.49569	10.1938	9.54643	10.2765	10.256	9.95644	58.7759	1063.31	22.4523	309.336	858.281	1146.48	18.0908	13.7775	0.381998	0.290919	0.761573	1.33578	3.66659e-08	1.04636e-07	0.00113027	0.000155959	0.405038	0.138793	8.01437e-06	1.28754e-05	0.00712543	0.0106924	0.654055	0.640337	1	1	-1	-1	0	0
An18g04650	An00g08536	strong similarity to guanine nucleotide exchange factor eIF-2B 34 kDa alpha subunit Gcn3 - Saccharomyces cerevisiae	7.28984	7.2333	8.47491	8.24824	6.84525	6.90728	8.02115	7.76945	8.08064	8.11449	8.20206	7.88063	8.02874	8.10173	153.444	328.917	117.48	238.08	280.605	256.658	2.14356	2.02656	0.765618	0.72383	0.945419	0.914658	6.03125e-07	1.31397e-06	0.00486746	0.00134496	0.6143	0.180697	5.33995e-05	5.91639e-05	0.0225392	0.0418104	0.812361	0.687965	1	1	-1	-1	0	0
An17g02090	An00g08680	strong similarity to homoserine kinase Thr1 - Saccharomyces cerevisiae	8.80629	8.9147	9.63338	9.5644	8.21186	8.48159	9.07611	9.23058	8.8827	8.91276	8.9187	8.6321	8.75254	8.65232	464.809	775.45	325.548	569.419	479.278	409.86	1.66832	1.74911	0.700392	0.734307	1.04842	0.855161	1.00912e-05	4.28213e-06	0.000259624	0.000802224	0.633563	0.0166034	0.00037149	0.000126111	0.00234617	0.0311692	0.82201	0.320365	1	1	-1	-1	0	0
An03g06270	An00g09491	strong similarity to isoamyl alcohol oxidase mreA - Aspergillus oryzae	5.99269	5.82488	5.55425	5.40764	5.48785	5.56291	4.91088	4.9863	5.69498	5.70205	5.59028	5.03349	4.87098	5.13109	60.0788	44.661	46.0579	30.8798	50.6481	32.264	0.743373	0.670455	0.766625	0.691426	0.901909	0.637023	0.0013707	0.000128067	0.00293442	0.000251751	0.321773	6.58334e-06	0.0127438	0.00133597	0.0152374	0.0142547	0.571955	0.00248904	-1	-1	-1	-1	0	-1
An11g02230	An00g09541	strong similarity to lanosterol 14 alpha-demethylase (P450(14DM)) CYP51 - Penicillium italicum	7.97682	8.31022	6.52288	6.46178	6.30441	6.41145	5.54799	5.71869	7.01304	6.72634	7.07856	6.75465	6.69344	6.91956	282.777	90.0298	82.0216	49.6368	122.728	110.6	0.318377	0.605168	0.290057	0.551338	1.90079	0.901187	9.69285e-08	0.000264019	4.2252e-08	6.1217e-05	0.000591117	0.212549	1.50659e-05	0.00231559	8.82183e-06	0.00594698	0.00643012	0.717882	-1	-1	-1	-1	1	0
An11g01040	An00g10105	strong similarity to oligopeptide transporter OPT1 - Candida albicans	6.02185	6.47246	6.89346	6.57488	5.29414	5.22168	5.68696	5.54765	5.29204	5.36442	5.17246	4.54857	4.53151	4.65549	75.9592	106.46	38.2639	49.0883	38.7549	23.8931	1.40155	1.28289	0.503743	0.461094	0.915337	0.616519	0.00599818	0.0296051	2.38168e-05	7.53695e-06	0.544634	8.93141e-05	0.0381576	0.0890878	0.000434863	0.00132489	0.766333	0.0136357	1	0	-1	-1	0	-1
An07g05670	An00g10520	strong similarity to hypothetical membrane protein YOR389w - Saccharomyces cerevisiae	6.2656	6.47212	7.35342	7.26009	5.78207	5.26523	5.60784	6.08425	6.14089	6.19858	6.12891	5.24844	5.20793	5.75031	82.6453	158.326	46.0029	57.5221	71.3146	42.2895	1.91573	1.2504	0.556631	0.363314	0.652702	0.592999	0.000900372	0.153026	0.00191401	2.09908e-05	0.0622751	0.00101201	0.00943468	0.292763	0.0108665	0.00274431	0.192341	0.0750165	1	0	-1	-1	0	0
An07g07300	An00g10574	strong similarity to prostaglandin f(2alpha) synthase TbPGFS - Trypanosoma brucei	4.98467	5.07517	5.86374	6.30546	4.46464	4.40028	5.32996	5.28202	6.35306	6.64224	6.55004	6.95546	7.10301	7.44705	32.6706	67.865	21.5925	39.5606	91.4626	143.858	2.07725	1.83214	0.660916	0.582931	0.882004	1.57286	5.2653e-05	0.000267231	0.00430294	0.000668215	0.461425	0.000540135	0.00122353	0.00233935	0.020459	0.0273323	0.703452	0.0526287	1	1	-1	-1	0	0
An03g04280	An00g10783	strong similarity to pyridoxine synthesis component pyroA - Aspergillus nidulans	8.88237	8.87919	9.67981	9.75443	7.69402	8.19923	9.07733	9.07698	10.2037	10.0626	10.2741	10.5569	10.5803	10.437	471.39	841.674	246.702	540.126	1160.16	1473.21	1.78552	2.18939	0.52335	0.641729	1.22619	1.26984	6.33203e-05	3.70745e-06	2.31148e-05	0.000593866	0.153563	0.00971204	0.00139275	0.000116026	0.000427715	0.0256407	0.358928	0.255086	1	1	-1	-1	0	0
An01g14170	An00g10910	strong similarity to RNA splicing factor Pad-1 - Neurospora crassa [deleted ORF]	7.1185	7.17325	7.61077	7.58642	6.68395	6.57276	7.19853	7.22412	7.20206	7.23975	7.29715	7.03551	7.12972	7.13794	141.62	193.823	98.9313	148.192	151.831	137.288	1.36861	1.49793	0.698571	0.764575	1.09448	0.904215	7.41925e-05	7.09195e-06	2.1994e-05	0.00028109	0.244023	0.0362798	0.00154217	0.000175171	0.000416902	0.0155422	0.484793	0.431197	1	1	-1	-1	0	0
An12g02200	An00g11405	strong similarity to heat shock protein Hsp30 - Saccharomyces cerevisiae	7.60386	7.41932	7.4199	7.92331	6.57809	6.86565	5.8345	6.27026	8.39412	8.06223	8.43779	8.73895	8.62762	9.06407	182.479	203.883	105.556	66.3663	314.747	448.889	1.1173	0.628728	0.578456	0.325511	0.562723	1.42619	0.466611	0.00889574	0.00322615	8.6121e-06	0.0180476	0.0127503	0.687965	0.0359579	0.0163339	0.00136903	0.0763436	0.286929	0	-1	-1	-1	0	0
An02g02700	An00g11657	strong similarity to phosphoribosylglycinamide formyltransferase Ade8 - Saccharomyces cerevisiae	6.3971	6.11537	8.17321	8.26317	5.89859	5.7527	7.39411	7.33294	7.98405	7.96403	8.03037	8.03071	7.99663	7.7733	76.439	297.798	56.7146	164.68	254.728	244.476	3.89589	2.90367	0.741959	0.552994	0.745317	0.95975	1.43708e-09	2.02515e-08	0.00256535	8.45726e-06	0.0209241	0.529463	1.18255e-06	4.77829e-06	0.0137444	0.00136903	0.0853373	0.886919	1	1	-1	-1	0	0
An16g02520	An00g11812	strong similarity to threonine synthase Thr4 - Saccharomyces cerevisiae	5.36296	5.55372	7.22191	7.25912	4.85697	5.12226	6.40923	6.45749	6.60109	6.47407	6.64774	6.68108	6.72339	6.376	43.9667	151.221	31.7705	86.4241	95.293	96.5692	3.43945	2.72027	0.722603	0.571508	0.790902	1.01339	1.85372e-08	1.73575e-07	0.00367578	5.27595e-05	0.0889141	0.858208	5.40243e-06	1.66741e-05	0.0180486	0.00550785	0.248714	0.974777	1	1	-1	-1	0	0
An13g03220	An00g12084	strong similarity to polyamine transport protein Tpo1 - Saccharomyces cerevisiae	6.70451	6.76383	8.1461	8.46482	5.94125	5.85008	7.03151	7.35409	8.15585	8.19994	8.17771	7.90795	7.87484	7.84367	106.46	316.368	59.5348	146.301	289.583	234.832	2.9717	2.45741	0.559221	0.46244	0.826936	0.810934	2.67329e-08	2.03595e-07	1.59324e-05	9.90214e-07	0.125889	0.00883071	6.63555e-06	1.81407e-05	0.000339204	0.000301133	0.316807	0.246262	1	1	-1	-1	0	0
An01g12430	An00g12315	strong similarity to hypothetical protein CAF32157.1 - Neurospora crassa	7.84741	7.95755	8.0952	7.82536	7.50815	7.31625	7.32268	7.34523	7.8325	8.06103	7.98155	7.69092	7.70782	7.92916	239.268	249.048	170.332	161.339	248.717	219.179	1.04088	0.947207	0.711887	0.647825	0.910011	0.88124	0.643664	0.532792	0.00186267	0.000288992	0.445209	0.092595	0.812288	0.686364	0.0106225	0.0156694	0.690102	0.578264	0	0	-1	-1	0	0
An02g06090	An00g12357	weak similarity to cellobiose dehydrogenase cdh - Trametes versicolor	6.84791	6.83749	7.07974	7.1642	6.25811	6.10277	6.55886	6.12247	6.35974	6.36722	6.16268	6.19462	6.13489	6.02333	114.778	139.292	72.5268	81.0457	78.6048	69.4362	1.21358	1.11746	0.631889	0.581841	0.920797	0.883359	0.0571028	0.249142	0.000354897	8.8086e-05	0.53601	0.123986	0.186247	0.413161	0.00295681	0.00756278	0.760402	0.62472	0	0	-1	-1	0	0
An08g01250	An00g12394	weak similarity to COP1-interacting protein 7 CIP7 - Arabidopsis thaliana	8.02529	8.2088	7.21628	7.4085	6.43896	6.25282	6.31371	6.39233	6.42885	7.01885	6.64428	7.15737	7.20677	7.73222	277.635	158.945	81.3399	81.7428	103.776	164.901	0.572497	1.00495	0.292974	0.514283	1.75539	1.58901	0.00231848	0.973001	2.65643e-06	0.000643759	0.017258	0.0020655	0.0185016	0.984991	0.000122555	0.0266436	0.0737844	0.116107	-1	0	-1	-1	0	0
An07g05660	An00g12767	similarity to hypothetical protein EAA64430.1 - Aspergillus nidulans	7.40284	9.09106	7.56077	8.0747	6.4143	4.4521	3.87367	4.05176	4.09834	4.32726	4.16335	3.83945	4.06957	3.77663	303.794	225.618	43.2072	15.5918	18.3323	14.8791	0.742666	0.360862	0.142225	0.0691073	0.4859	0.811634	0.46284	0.0240205	0.000378343	2.45148e-05	0.218247	0.526862	0.684642	0.0760231	0.00309692	0.00308953	0.451036	0.88616	0	0	-1	-1	0	0
An01g13320	An00g13046	weak similarity to integral membrane protein PTH11 - Magnaporthe grisea	9.28894	9.55947	9.16459	9.5641	7.69576	7.88828	8.8645	8.601	8.23838	8.29465	8.32564	7.71042	7.68636	7.45404	687.018	659.097	221.631	425.422	312.177	196.303	0.959359	1.9195	0.322599	0.645462	2.00082	0.628821	0.698852	5.57878e-05	2.54597e-07	0.00142195	0.000608305	0.000184851	0.843776	0.000731411	3.17705e-05	0.043337	0.00655087	0.0243951	0	1	-1	-1	1	-1

## Sheet: 03.04.06 both
ORF	alias	annotation	061018MJA_ANIGERa_AR01.CEL	061018MJA_ANIGERa_AR07.CEL	061018MJA_ANIGERa_AR02.CEL	061018MJA_ANIGERa_AR08.CEL	061018MJA_ANIGERa_AR03.CEL	061018MJA_ANIGERa_AR05.CEL	061018MJA_ANIGERa_AR04.CEL	061018MJA_ANIGERa_AR06.CEL	080805MJA_ANIGERa_100480-01.CEL	080805MJA_ANIGERa_100480-02.CEL	080805MJA_ANIGERa_100480-06.CEL	080807MJA_ANIGERa_100480-20.CEL	080807MJA_ANIGERa_100480-21.CEL	080807MJA_ANIGERa_100480-22.CEL	racA.wt.2	racA.wt.4	racA.G12V.2	racA.G12V.4	wt	racA.D	FC 01	FC 02	FC 03	FC 04	FC 05	FC 06	pValue 01	pValue 02	pValue 03	pValue 04	pValue 05	pValue 06	FDR 01	FDR 02	FDR 03	FDR 04	FDR 05	FDR 06	decide (FDR < 0.05) 01	decide (FDR < 0.05) 02	decide (FDR < 0.05) 03	decide (FDR < 0.05) 04	decide (FDR < 0.05) 05	decide (FDR < 0.05) 06
An01g10970	An00g00073	strong similarity to quinate transporter qa-y - Neurospora crassa	6.19539	6.15572	6.61773	6.6252	5.48953	5.44715	5.94549	6.08483	6.1109	6.17536	6.05471	5.31741	5.36653	5.31296	72.2817	98.4599	44.2725	64.6761	69.2458	40.2886	1.36217	1.46086	0.612499	0.656877	1.07245	0.58182	9.14503e-05	1.42151e-05	1.13672e-06	5.26485e-06	0.364888	4.87836e-08	0.00181204	0.000284893	7.87206e-05	0.0010089	0.616923	6.82434e-05	1	1	-1	-1	0	-1
An16g07920	An00g01632	strong similarity to hypothetical protein EAA64623.1 - Aspergillus nidulans	9.4599	9.2936	7.33828	7.51025	10.3469	9.90376	9.38516	8.94027	6.6901	6.64295	6.47147	7.99951	7.73254	8.51706	664.787	171.762	1116.94	573.128	97.1072	271.167	0.258371	0.513123	1.68015	3.33676	1.98599	2.79245	3.39966e-06	0.00155817	0.00793792	1.05163e-05	0.0115854	6.96449e-06	0.000178119	0.00922827	0.0330952	0.00161662	0.0547342	0.00256385	-1	-1	1	1	0	1
An01g08150	An00g03916	similarity to carbonyl reductase CBR - Homo sapiens	4.66474	4.67364	4.48093	4.38334	8.83677	8.98546	6.24861	6.23796	4.54028	4.60718	4.551	5.92612	5.93359	5.85101	25.4429	21.5877	481.407	75.7557	23.6891	59.8622	0.848478	0.157363	18.9211	3.5092	0.185465	2.52699	0.0100596	7.17378e-13	3.84497e-15	5.47427e-11	9.79366e-11	1.67118e-10	0.0550348	6.65752e-09	5.37873e-11	3.10122e-07	1.37004e-06	5.84452e-07	0	-1	1	1	-1	1
An09g00160	An00g04762	similarity to hypothetical protein Rv0839 - Mycobacterium tuberculosis	5.92503	5.60046	5.68108	5.3394	6.95687	6.91795	6.28156	6.31183	6.05996	5.68489	5.83957	6.99642	7.24278	6.77378	54.2949	45.5772	122.565	78.613	58.1406	128.385	0.839437	0.641397	2.2574	1.72483	0.76408	2.20817	0.170597	0.00325733	2.51374e-05	0.000759682	0.139184	4.719e-06	0.382388	0.016385	0.000450829	0.0300203	0.338226	0.00206149	0	-1	1	1	0	1
An03g00770	An00g07022	strong similarity to hypothetical allergic bronchopulmonary aspergillosis allergen rAsp f 4 from patent WO9828624-A1 - Aspergillus fumigatus	9.62754	10.1828	11.2864	11.1362	9.18035	8.69052	9.93083	10.0644	10.1431	10.1598	10.3125	9.17042	9.21827	9.03669	958.868	2370.98	489.591	1022.32	1180.46	564.878	2.47268	2.08812	0.510593	0.431183	0.844475	0.478524	1.49846e-05	9.8277e-05	0.000213796	2.9729e-05	0.362058	1.53983e-05	0.000496729	0.00109896	0.00202877	0.0035816	0.61444	0.00468276	1	1	-1	-1	0	-1
An01g07000	An00g07321	strong similarity to C-14 sterol reductase Erg24 - Saccharomyces cerevisiae	9.00747	8.76436	9.44059	9.21955	8.50016	8.1789	7.43766	7.67073	8.84686	9.09255	8.88911	7.90858	7.98307	8.36846	473.072	643.622	323.929	187.949	492.112	271.857	1.36052	0.580217	0.684734	0.292017	0.426468	0.552429	0.0246001	0.000731437	0.00836054	4.01506e-07	0.000328232	6.65621e-05	0.103967	0.00510448	0.0345308	0.000165196	0.00426336	0.0114955	0	-1	-1	-1	-1	-1
An01g13290	An00g07512	strong similarity to choline permease Hnm1 - Saccharomyces cerevisiae	11.1675	10.986	10.7472	10.9471	9.99838	10.0454	9.88211	9.80016	10.2675	10.3679	10.3468	9.62714	9.60915	8.80298	2159.87	1842.13	1039.65	917.226	1284.86	650.96	0.852889	0.882242	0.48135	0.497916	1.03442	0.506639	0.312129	0.422087	0.00046008	0.000666192	0.876415	0.000157959	0.550615	0.590163	0.0035578	0.0273323	0.949003	0.021878	0	0	-1	-1	0	-1
An03g05530	An00g08054	strong similarity to endo-beta-1,4-glucanase EGIII-like from patent WO9931255-A2 - Emericella desertoru	7.37787	7.64713	8.48581	8.92411	9.44743	8.98501	7.94883	7.70988	7.01877	7.16185	6.87459	5.98485	5.94762	6.45515	182.595	417.306	594.784	227.442	129.643	69.9963	2.28542	0.382395	3.2574	0.545025	0.167319	0.539914	0.000142411	3.74537e-05	5.35153e-06	0.00161072	2.73543e-06	0.000303902	0.00245949	0.000556531	0.000172095	0.0467337	0.000256818	0.0345633	1	-1	1	-1	-1	-1
An01g03780	An00g08177	strong similarity to EST SEQ ID NO:4125 from patent WO200056762-A2 - Aspergillus niger	7.63823	7.56558	7.7458	7.84292	8.08585	7.74275	7.36851	7.37527	7.70652	7.65844	7.64765	7.19743	7.11702	7.19229	194.268	221.991	241.235	165.638	203.78	143.899	1.14271	0.686623	1.24177	0.746145	0.600874	0.706149	0.0834299	0.000210964	0.0101154	0.00147368	0.000300681	7.17669e-05	0.24059	0.00195055	0.0401318	0.0438638	0.00402509	0.0118895	0	-1	1	-1	-1	-1
An16g06300	An00g08251	strong similarity to Fe(II) permease Fet4 - Saccharomyces cerevisiae	9.04275	9.11616	9.5856	9.49858	8.6319	8.16682	8.09974	8.39173	7.87036	7.93274	7.92551	6.66165	6.6387	6.2972	540.989	745.514	337.645	303.539	240.44	92.5728	1.37806	0.898989	0.624125	0.407154	0.65236	0.385014	0.013869	0.354568	0.00122765	4.52614e-06	0.018833	3.16634e-07	0.0692411	0.525505	0.00761067	0.00087939	0.0785962	0.000295293	0	0	-1	-1	0	-1
An12g04630	An00g08334	strong similarity to full length Penicillin V amidohydrolase from patent US5516679-A - Fusarium oxysporum	4.49298	4.66673	5.16814	5.41939	5.40756	4.98996	4.48979	4.57635	5.17991	5.41737	5.3154	4.79181	4.74362	4.58599	23.9152	39.2268	36.7267	23.1521	39.5122	26.1211	1.64025	0.63039	1.53571	0.590212	0.384326	0.661088	0.000382196	0.000662675	0.00114673	0.000227514	2.54196e-05	0.000314708	0.0049921	0.00474953	0.00719999	0.0138982	0.000800888	0.0355036	1	-1	1	-1	-1	-1
An03g06270	An00g09491	strong similarity to isoamyl alcohol oxidase mreA - Aspergillus oryzae	5.99269	5.82488	5.55425	5.40764	5.48785	5.56291	4.91088	4.9863	5.69498	5.70205	5.59028	5.03349	4.87098	5.13109	60.0788	44.661	46.0579	30.8798	50.6481	32.264	0.743373	0.670455	0.766625	0.691426	0.901909	0.637023	0.0013707	0.000128067	0.00293442	0.000251751	0.321773	6.58334e-06	0.0127438	0.00133597	0.0152374	0.0142547	0.571955	0.00248904	-1	-1	-1	-1	0	-1
An18g01090	An00g09619	strong similarity to lysophospholipase from patent WO0127251-A - Aspergillus oryzae	5.22383	4.94126	6.80811	6.52581	6.22704	5.96548	5.43301	5.55271	5.8751	6.88776	6.05207	4.93165	5.18425	4.73312	33.8844	101.614	68.416	45.0315	77.2596	30.903	2.99885	0.658201	2.0191	0.443161	0.219484	0.399989	0.000109538	0.0493624	0.0033513	0.00121046	0.00013459	9.07109e-05	0.00204316	0.129458	0.0167853	0.0391425	0.00239513	0.0136447	1	0	1	-1	-1	-1
An11g01040	An00g10105	strong similarity to oligopeptide transporter OPT1 - Candida albicans	6.02185	6.47246	6.89346	6.57488	5.29414	5.22168	5.68696	5.54765	5.29204	5.36442	5.17246	4.54857	4.53151	4.65549	75.9592	106.46	38.2639	49.0883	38.7549	23.8931	1.40155	1.28289	0.503743	0.461094	0.915337	0.616519	0.00599818	0.0296051	2.38168e-05	7.53695e-06	0.544634	8.93141e-05	0.0381576	0.0890878	0.000434863	0.00132489	0.766333	0.0136357	1	0	-1	-1	0	-1
An17g01945	An00g10692	strong similarity to protein Rvs161 - Saccharomyces cerevisiae	8.84923	8.77153	9.31555	9.22067	9.90901	9.57373	8.5619	8.85752	8.85038	9.04152	8.91277	8.09702	8.24902	8.26066	448.941	616.565	855.944	418.682	489.407	294.523	1.37338	0.489146	1.90658	0.679056	0.356163	0.601796	0.00426941	5.23722e-06	1.40654e-05	0.00108908	4.27952e-06	1.98958e-05	0.0298717	0.000144219	0.00031133	0.036889	0.000324506	0.00546396	1	-1	1	-1	-1	-1
An17g01970	An00g10924	strong similarity to Rvs161 - Saccharomyces cerevisiae [deleted ORF]	8.87618	8.70582	9.3221	9.28298	10.0627	9.68723	8.56785	8.79739	8.89478	9.16915	8.99995	8.23247	8.27318	8.26876	442.95	631.458	938.984	410.894	519.613	306.159	1.42557	0.437594	2.11984	0.650707	0.30696	0.589206	0.00236895	1.54573e-06	3.99188e-06	0.00058134	1.39162e-06	1.66397e-05	0.0187729	6.5525e-05	0.000144669	0.0254261	0.000194674	0.00484942	1	-1	1	-1	-1	-1
An11g02990	An00g11738	strong similarity to astaxanthin synthetase from patent EP1035206 - Phaffia rhodozyma	7.20834	7.03125	7.80233	7.63593	8.17059	7.99951	7.13345	7.31825	6.90476	6.80672	6.96357	6.06629	6.25366	6.22028	139.082	210.712	271.545	149.691	118.742	72.5086	1.51501	0.551258	1.9524	0.710407	0.363863	0.610641	0.000185898	7.02753e-06	2.23652e-06	0.000879409	1.14886e-06	6.1199e-06	0.00297001	0.000174754	0.000114185	0.0326314	0.000178571	0.00241467	1	-1	1	-1	-1	-1
An01g13320	An00g13046	weak similarity to integral membrane protein PTH11 - Magnaporthe grisea	9.28894	9.55947	9.16459	9.5641	7.69576	7.88828	8.8645	8.601	8.23838	8.29465	8.32564	7.71042	7.68636	7.45404	687.018	659.097	221.631	425.422	312.177	196.303	0.959359	1.9195	0.322599	0.645462	2.00082	0.628821	0.698852	5.57878e-05	2.54597e-07	0.00142195	0.000608305	0.000184851	0.843776	0.000731411	3.17705e-05	0.043337	0.00655087	0.0243951	0	1	-1	-1	1	-1

## Sheet: 04.06 both
ORF	alias	annotation	061018MJA_ANIGERa_AR01.CEL	061018MJA_ANIGERa_AR07.CEL	061018MJA_ANIGERa_AR02.CEL	061018MJA_ANIGERa_AR08.CEL	061018MJA_ANIGERa_AR03.CEL	061018MJA_ANIGERa_AR05.CEL	061018MJA_ANIGERa_AR04.CEL	061018MJA_ANIGERa_AR06.CEL	080805MJA_ANIGERa_100480-01.CEL	080805MJA_ANIGERa_100480-02.CEL	080805MJA_ANIGERa_100480-06.CEL	080807MJA_ANIGERa_100480-20.CEL	080807MJA_ANIGERa_100480-21.CEL	080807MJA_ANIGERa_100480-22.CEL	racA.wt.2	racA.wt.4	racA.G12V.2	racA.G12V.4	wt	racA.D	FC 01	FC 02	FC 03	FC 04	FC 05	FC 06	pValue 01	pValue 02	pValue 03	pValue 04	pValue 05	pValue 06	FDR 01	FDR 02	FDR 03	FDR 04	FDR 05	FDR 06	decide (FDR < 0.05) 01	decide (FDR < 0.05) 02	decide (FDR < 0.05) 03	decide (FDR < 0.05) 04	decide (FDR < 0.05) 05	decide (FDR < 0.05) 06
An01g10970	An00g00073	strong similarity to quinate transporter qa-y - Neurospora crassa	6.19539	6.15572	6.61773	6.6252	5.48953	5.44715	5.94549	6.08483	6.1109	6.17536	6.05471	5.31741	5.36653	5.31296	72.2817	98.4599	44.2725	64.6761	69.2458	40.2886	1.36217	1.46086	0.612499	0.656877	1.07245	0.58182	9.14503e-05	1.42151e-05	1.13672e-06	5.26485e-06	0.364888	4.87836e-08	0.00181204	0.000284893	7.87206e-05	0.0010089	0.616923	6.82434e-05	1	1	-1	-1	0	-1
An15g03880	An00g01540	hypothetical protein	8.13354	8.1392	8.33107	8.2023	8.18271	7.60674	6.80108	7.40615	7.95836	7.91743	7.80725	6.68095	6.67662	7.10178	281.379	307.979	237.984	137.531	237.922	112.969	1.09453	0.5779	0.84578	0.446561	0.527987	0.474814	0.55964	0.00364778	0.288132	0.000206142	0.0116065	7.10524e-05	0.754951	0.0178735	0.478078	0.0131078	0.0547993	0.0118895	0	-1	0	-1	0	-1
An16g07920	An00g01632	strong similarity to hypothetical protein EAA64623.1 - Aspergillus nidulans	9.4599	9.2936	7.33828	7.51025	10.3469	9.90376	9.38516	8.94027	6.6901	6.64295	6.47147	7.99951	7.73254	8.51706	664.787	171.762	1116.94	573.128	97.1072	271.167	0.258371	0.513123	1.68015	3.33676	1.98599	2.79245	3.39966e-06	0.00155817	0.00793792	1.05163e-05	0.0115854	6.96449e-06	0.000178119	0.00922827	0.0330952	0.00161662	0.0547342	0.00256385	-1	-1	1	1	0	1
An15g04810	An00g03764	similarity to alpha-1,3-mannosyltransferase Mnt2 - Saccharomyces cerevisiae	8.57037	8.31129	8.71845	8.59805	8.91229	8.62283	7.8604	8.06656	7.63372	7.71035	7.68971	6.38252	6.49421	6.72995	347.491	404.01	435.811	249.601	204.78	92.7683	1.16265	0.572727	1.25417	0.617808	0.492604	0.453016	0.14127	9.85205e-05	0.0361056	0.000337035	0.000245156	4.81067e-07	0.339441	0.0011008	0.107099	0.0176503	0.0035502	0.000420603	0	-1	0	-1	-1	-1
An01g08150	An00g03916	similarity to carbonyl reductase CBR - Homo sapiens	4.66474	4.67364	4.48093	4.38334	8.83677	8.98546	6.24861	6.23796	4.54028	4.60718	4.551	5.92612	5.93359	5.85101	25.4429	21.5877	481.407	75.7557	23.6891	59.8622	0.848478	0.157363	18.9211	3.5092	0.185465	2.52699	0.0100596	7.17378e-13	3.84497e-15	5.47427e-11	9.79366e-11	1.67118e-10	0.0550348	6.65752e-09	5.37873e-11	3.10122e-07	1.37004e-06	5.84452e-07	0	-1	1	1	-1	1
An02g01180	An00g04065	similarity to diacylglycerol pyrophosphate phosphatase Dpp1 - Saccharomyces cerevisiae	8.91167	8.92648	9.0121	9.1392	9.26139	9.02256	7.57006	8.20062	8.38541	8.0848	8.46736	7.20404	7.33725	7.66511	484.072	539.564	564.95	236.442	317.92	169.147	1.11464	0.418519	1.16708	0.438209	0.375475	0.532041	0.459249	6.33349e-05	0.298046	0.000102116	0.000438953	0.000178809	0.68171	0.000795106	0.488762	0.00824388	0.00519941	0.0238224	0	-1	0	-1	-1	-1
An18g00810	An00g04242	similarity to frenolicin gene E product frnE from patent EP806480-A2 - Streptomyces sp.	10.3793	10.1391	11.2576	10.7727	10.7122	10.3369	9.62876	10.3334	10.2676	10.3528	10.0424	8.48591	8.41281	8.70092	1225.55	2069.61	1473.01	1010.65	1193.45	370.47	1.68872	0.686113	1.20192	0.48833	0.406293	0.31042	0.00717771	0.0377453	0.274587	0.000872845	0.00205163	1.78933e-06	0.0433706	0.106306	0.462795	0.0326314	0.0155004	0.00104295	1	0	0	-1	-1	-1
An04g03870	An00g04575	weak similarity to phosphatidic acid phosphatase ATPAP2 from patent WO200005385-A1 - Arabidopsis thaliana	8.37975	8.39025	8.20857	8.16193	8.47302	8.4302	7.33233	7.73924	7.75235	7.98277	7.85607	7.18594	7.16748	7.27384	334.3	291.076	350.097	185.566	232.927	147.962	0.870702	0.530041	1.04725	0.637516	0.608751	0.635232	0.122315	8.26716e-06	0.588484	0.000186373	0.00131549	2.89909e-05	0.308746	0.000194042	0.746897	0.0119595	0.0113525	0.00675923	0	-1	0	-1	-1	-1
An09g00160	An00g04762	similarity to hypothetical protein Rv0839 - Mycobacterium tuberculosis	5.92503	5.60046	5.68108	5.3394	6.95687	6.91795	6.28156	6.31183	6.05996	5.68489	5.83957	6.99642	7.24278	6.77378	54.2949	45.5772	122.565	78.613	58.1406	128.385	0.839437	0.641397	2.2574	1.72483	0.76408	2.20817	0.170597	0.00325733	2.51374e-05	0.000759682	0.139184	4.719e-06	0.382388	0.016385	0.000450829	0.0300203	0.338226	0.00206149	0	-1	1	1	0	1
An01g02860	An00g04878	similarity to hypothetical protein SPBC651.03c - Schizosaccharomyces pombe	6.76898	6.46299	6.65651	6.30579	6.33311	6.24623	5.2806	5.75477	6.38444	6.41462	6.4021	5.16865	5.37478	5.11489	98.0865	89.335	78.231	45.813	84.4712	37.257	0.910778	0.585612	0.797572	0.512823	0.64298	0.441062	0.429396	0.000606864	0.0720766	9.74089e-05	0.0188173	2.12576e-06	0.657826	0.00441238	0.18005	0.00801561	0.0785688	0.00118949	0	-1	0	-1	0	-1
An03g02530	An00g04989	similarity to hypothetical proteinase encoded by SCD8A.14c - Streptomyces coelicolor	9.64521	9.48743	9.88859	9.71858	9.7648	9.14199	8.37777	8.68557	9.03911	9.1123	8.89104	8.02325	7.89743	8.41354	758.139	893.662	701.063	370.074	517.045	276.552	1.17876	0.527875	0.924715	0.41411	0.447824	0.534869	0.27388	0.000883599	0.594826	6.19608e-05	0.00206556	0.000208096	0.510161	0.00593981	0.751809	0.00597772	0.0155769	0.0262257	0	-1	0	-1	-1	-1
An11g01190	An00g05658	similarity to protein participating in extracellular/cell surface phenomena Ecm33 - Saccharomyces cerevisiae	7.78901	7.28526	7.63622	7.59386	7.88637	7.86981	6.47142	6.69983	6.22805	6.59614	6.19931	4.69092	4.70574	4.30119	185.739	196.045	235.257	96.0442	81.074	23.6858	1.05548	0.408253	1.2666	0.489909	0.386792	0.29215	0.686597	2.31075e-05	0.096544	0.0001748	0.000289079	1.28204e-07	0.837513	0.000397602	0.223784	0.0114266	0.00391853	0.000137957	0	-1	0	-1	-1	-1
An02g08030	An00g05711	similarity to membrane spanning protein RIC1 - Phytophthora infestans	9.29336	8.9938	10.0318	9.89815	9.94158	9.19613	8.88161	9.14352	9.33079	9.55581	9.16081	8.23435	8.2067	8.27861	565.576	999.425	759.473	516.479	652.185	302.31	1.76709	0.680049	1.34283	0.516776	0.38484	0.463534	0.00216189	0.0212105	0.0650222	0.000737344	0.000619712	3.70237e-05	0.017583	0.0692126	0.167052	0.0293866	0.00662968	0.00809257	1	0	0	-1	-1	-1
An02g07950	An00g05782	similarity to regulator protein Uga3 - Saccharomyces cerevisiae	6.49838	6.20744	7.03016	6.55603	6.74115	6.27566	5.76112	5.86236	6.02838	6.04361	6.08465	5.24795	5.2394	5.13431	81.7366	110.899	91.0387	56.1705	66.3588	36.9427	1.35678	0.616996	1.11381	0.506504	0.454751	0.556712	0.0236784	0.00156203	0.375514	0.00010254	0.000534884	6.4228e-05	0.101098	0.00923944	0.568329	0.00824388	0.0060004	0.0112311	0	-1	0	-1	-1	-1
An01g10900	An00g06240	similarity to hypothetical la costa protein lcs - Drosophila melanogaster	4.48531	4.54378	7.01405	7.06194	4.65204	4.36397	4.93743	4.95064	6.54162	6.39785	6.49979	4.81127	4.71267	4.78741	22.8568	131.416	22.7533	30.7824	89.2484	27.2928	5.74954	1.35288	0.995475	0.234237	0.235302	0.305807	1.65978e-11	0.000793035	0.946967	1.3248e-10	6.17925e-09	1.32828e-10	1.16093e-07	0.00542748	0.973481	3.70652e-07	2.16104e-05	5.84452e-07	1	1	0	-1	-1	-1
An03g00280	An00g06353	similarity to tyrosinase and tyrosinase activator protein fusion enzyme from patent WO9513386-A - Streptomyces antibioticus	5.16575	5.33733	5.51767	5.31678	5.18792	5.49908	6.16869	6.15751	5.95567	6.12296	5.96756	6.68212	6.62638	6.49392	38.0953	42.7314	40.6025	71.6602	64.6867	97.0601	1.1217	1.76492	1.06582	1.67699	1.57343	1.50047	0.194648	2.47129e-05	0.459859	5.83561e-05	0.00256948	8.28581e-05	0.414806	0.000414023	0.644027	0.0057353	0.0181081	0.0131716	0	1	0	1	1	1
An03g00770	An00g07022	strong similarity to hypothetical allergic bronchopulmonary aspergillosis allergen rAsp f 4 from patent WO9828624-A1 - Aspergillus fumigatus	9.62754	10.1828	11.2864	11.1362	9.18035	8.69052	9.93083	10.0644	10.1431	10.1598	10.3125	9.17042	9.21827	9.03669	958.868	2370.98	489.591	1022.32	1180.46	564.878	2.47268	2.08812	0.510593	0.431183	0.844475	0.478524	1.49846e-05	9.8277e-05	0.000213796	2.9729e-05	0.362058	1.53983e-05	0.000496729	0.00109896	0.00202877	0.0035816	0.61444	0.00468276	1	1	-1	-1	0	-1
An01g07000	An00g07321	strong similarity to C-14 sterol reductase Erg24 - Saccharomyces cerevisiae	9.00747	8.76436	9.44059	9.21955	8.50016	8.1789	7.43766	7.67073	8.84686	9.09255	8.88911	7.90858	7.98307	8.36846	473.072	643.622	323.929	187.949	492.112	271.857	1.36052	0.580217	0.684734	0.292017	0.426468	0.552429	0.0246001	0.000731437	0.00836054	4.01506e-07	0.000328232	6.65621e-05	0.103967	0.00510448	0.0345308	0.000165196	0.00426336	0.0114955	0	-1	-1	-1	-1	-1
An04g04630	An00g07370	strong similarity to capsule-associated protein CAP59 - Cryptococcus neoformans	6.75101	6.98821	6.97056	6.94889	6.79883	7.10953	6.30233	6.28413	5.83939	6.14391	5.86358	5.27194	5.13101	5.24958	116.939	124.476	123.998	78.4242	61.7753	37.2072	1.06446	0.632461	1.06037	0.630033	0.594162	0.602299	0.500216	0.000309119	0.526467	0.000288712	0.00164192	2.14824e-05	0.712842	0.00262236	0.699756	0.0156694	0.0132385	0.00546396	0	-1	0	-1	-1	-1
An01g13290	An00g07512	strong similarity to choline permease Hnm1 - Saccharomyces cerevisiae	11.1675	10.986	10.7472	10.9471	9.99838	10.0454	9.88211	9.80016	10.2675	10.3679	10.3468	9.62714	9.60915	8.80298	2159.87	1842.13	1039.65	917.226	1284.86	650.96	0.852889	0.882242	0.48135	0.497916	1.03442	0.506639	0.312129	0.422087	0.00046008	0.000666192	0.876415	0.000157959	0.550615	0.590163	0.0035578	0.0273323	0.949003	0.021878	0	0	-1	-1	0	-1
An03g05530	An00g08054	strong similarity to endo-beta-1,4-glucanase EGIII-like from patent WO9931255-A2 - Emericella desertoru	7.37787	7.64713	8.48581	8.92411	9.44743	8.98501	7.94883	7.70988	7.01877	7.16185	6.87459	5.98485	5.94762	6.45515	182.595	417.306	594.784	227.442	129.643	69.9963	2.28542	0.382395	3.2574	0.545025	0.167319	0.539914	0.000142411	3.74537e-05	5.35153e-06	0.00161072	2.73543e-06	0.000303902	0.00245949	0.000556531	0.000172095	0.0467337	0.000256818	0.0345633	1	-1	1	-1	-1	-1
An06g00320	An00g08172	strong similarity to EST an_0358 - Aspergillus niger	8.64302	8.5285	8.70488	8.50027	8.5046	7.87245	6.45536	6.50516	8.51532	8.35869	8.27071	5.31026	5.34692	6.22965	384.213	388.717	291.737	89.2798	333.507	49.4858	1.01172	0.306028	0.759312	0.229678	0.302482	0.14838	0.951975	5.4283e-05	0.172866	7.14527e-06	0.000883401	6.364e-08	0.980821	0.000718381	0.33793	0.00128148	0.00854036	8.09327e-05	0	-1	0	-1	-1	-1
An01g03780	An00g08177	strong similarity to EST SEQ ID NO:4125 from patent WO200056762-A2 - Aspergillus niger	7.63823	7.56558	7.7458	7.84292	8.08585	7.74275	7.36851	7.37527	7.70652	7.65844	7.64765	7.19743	7.11702	7.19229	194.268	221.991	241.235	165.638	203.78	143.899	1.14271	0.686623	1.24177	0.746145	0.600874	0.706149	0.0834299	0.000210964	0.0101154	0.00147368	0.000300681	7.17669e-05	0.24059	0.00195055	0.0401318	0.0438638	0.00402509	0.0118895	0	-1	1	-1	-1	-1
An16g06300	An00g08251	strong similarity to Fe(II) permease Fet4 - Saccharomyces cerevisiae	9.04275	9.11616	9.5856	9.49858	8.6319	8.16682	8.09974	8.39173	7.87036	7.93274	7.92551	6.66165	6.6387	6.2972	540.989	745.514	337.645	303.539	240.44	92.5728	1.37806	0.898989	0.624125	0.407154	0.65236	0.385014	0.013869	0.354568	0.00122765	4.52614e-06	0.018833	3.16634e-07	0.0692411	0.525505	0.00761067	0.00087939	0.0785962	0.000295293	0	0	-1	-1	0	-1
An12g04630	An00g08334	strong similarity to full length Penicillin V amidohydrolase from patent US5516679-A - Fusarium oxysporum	4.49298	4.66673	5.16814	5.41939	5.40756	4.98996	4.48979	4.57635	5.17991	5.41737	5.3154	4.79181	4.74362	4.58599	23.9152	39.2268	36.7267	23.1521	39.5122	26.1211	1.64025	0.63039	1.53571	0.590212	0.384326	0.661088	0.000382196	0.000662675	0.00114673	0.000227514	2.54196e-05	0.000314708	0.0049921	0.00474953	0.00719999	0.0138982	0.000800888	0.0355036	1	-1	1	-1	-1	-1
An03g01160	An00g08687	strong similarity to epidermal protein-5 HEPI - Homo sapiens	7.53135	7.0406	8.63111	8.31548	7.89011	7.46418	7.33955	7.83494	8.1559	8.27959	8.18847	7.35014	7.45044	7.44566	156.062	355.4	204.669	192.304	295.699	170.711	2.2773	0.939587	1.31146	0.541092	0.412588	0.577313	7.75911e-05	0.657671	0.0724989	0.000857408	0.000741788	0.000422429	0.00159153	0.785466	0.180718	0.0323296	0.00754681	0.043134	1	0	0	-1	-1	-1
An16g08090	An00g09021	strong similarity to hypothetical protein B2J23.120 - Neurospora crassa	6.89664	7.01277	7.42509	6.86299	7.0515	7.04839	5.67977	6.20283	6.49386	6.57821	6.45357	5.25327	5.28428	4.78443	124.044	141.439	132.509	61.4481	91.0471	34.4713	1.14024	0.463728	1.06824	0.434449	0.406695	0.37861	0.390913	0.000257119	0.662088	0.000129464	0.00112499	4.86305e-06	0.624613	0.00226501	0.799202	0.0096849	0.0101273	0.00206149	0	-1	0	-1	-1	-1
An03g06270	An00g09491	strong similarity to isoamyl alcohol oxidase mreA - Aspergillus oryzae	5.99269	5.82488	5.55425	5.40764	5.48785	5.56291	4.91088	4.9863	5.69498	5.70205	5.59028	5.03349	4.87098	5.13109	60.0788	44.661	46.0579	30.8798	50.6481	32.264	0.743373	0.670455	0.766625	0.691426	0.901909	0.637023	0.0013707	0.000128067	0.00293442	0.000251751	0.321773	6.58334e-06	0.0127438	0.00133597	0.0152374	0.0142547	0.571955	0.00248904	-1	-1	-1	-1	0	-1
An18g01090	An00g09619	strong similarity to lysophospholipase from patent WO0127251-A - Aspergillus oryzae	5.22383	4.94126	6.80811	6.52581	6.22704	5.96548	5.43301	5.55271	5.8751	6.88776	6.05207	4.93165	5.18425	4.73312	33.8844	101.614	68.416	45.0315	77.2596	30.903	2.99885	0.658201	2.0191	0.443161	0.219484	0.399989	0.000109538	0.0493624	0.0033513	0.00121046	0.00013459	9.07109e-05	0.00204316	0.129458	0.0167853	0.0391425	0.00239513	0.0136447	1	0	1	-1	-1	-1
An07g04900	An00g09870	strong similarity to EST an_2589 - Aspergillus niger	7.59498	7.6864	9.21554	8.8305	8.74483	7.62034	7.9509	7.62301	8.19394	8.46831	8.05905	7.04432	7.08524	6.90341	199.562	520.236	290.538	220.855	302.425	128.979	2.60689	0.760157	1.45588	0.424527	0.291595	0.426481	0.00045369	0.19014	0.0819053	0.00106924	0.000942581	0.000226438	0.00568189	0.341842	0.197805	0.0367615	0.00895253	0.0273072	1	0	0	-1	-1	-1
An11g01040	An00g10105	strong similarity to oligopeptide transporter OPT1 - Candida albicans	6.02185	6.47246	6.89346	6.57488	5.29414	5.22168	5.68696	5.54765	5.29204	5.36442	5.17246	4.54857	4.53151	4.65549	75.9592	106.46	38.2639	49.0883	38.7549	23.8931	1.40155	1.28289	0.503743	0.461094	0.915337	0.616519	0.00599818	0.0296051	2.38168e-05	7.53695e-06	0.544634	8.93141e-05	0.0381576	0.0890878	0.000434863	0.00132489	0.766333	0.0136357	1	0	-1	-1	0	-1
An17g01945	An00g10692	strong similarity to protein Rvs161 - Saccharomyces cerevisiae	8.84923	8.77153	9.31555	9.22067	9.90901	9.57373	8.5619	8.85752	8.85038	9.04152	8.91277	8.09702	8.24902	8.26066	448.941	616.565	855.944	418.682	489.407	294.523	1.37338	0.489146	1.90658	0.679056	0.356163	0.601796	0.00426941	5.23722e-06	1.40654e-05	0.00108908	4.27952e-06	1.98958e-05	0.0298717	0.000144219	0.00031133	0.036889	0.000324506	0.00546396	1	-1	1	-1	-1	-1
An07g05820	An00g10772	strong similarity to hypothetical transmembrane protein usgS - Aspergillus nidulans	10.0816	9.87193	10.5686	10.2664	9.91594	9.3824	9.06594	9.49316	9.5845	9.72861	9.60669	8.23163	8.40261	8.22709	1007.66	1367.7	802.952	621.473	797.827	312.37	1.35731	0.773985	0.796852	0.454393	0.570235	0.391526	0.0336912	0.0670235	0.0992945	5.58736e-05	0.00909101	1.53848e-06	0.128613	0.160988	0.227936	0.00567945	0.0459278	0.000952444	0	0	0	-1	-1	-1
An17g01970	An00g10924	strong similarity to Rvs161 - Saccharomyces cerevisiae [deleted ORF]	8.87618	8.70582	9.3221	9.28298	10.0627	9.68723	8.56785	8.79739	8.89478	9.16915	8.99995	8.23247	8.27318	8.26876	442.95	631.458	938.984	410.894	519.613	306.159	1.42557	0.437594	2.11984	0.650707	0.30696	0.589206	0.00236895	1.54573e-06	3.99188e-06	0.00058134	1.39162e-06	1.66397e-05	0.0187729	6.5525e-05	0.000144669	0.0254261	0.000194674	0.00484942	1	-1	1	-1	-1	-1
An04g04210	An00g10928	strong similarity to S-adenosyl-L-methionine:delta24-sterol-C-methyltransferase - Glycine max	4.6125	5.15989	5.30585	5.4938	4.99841	5.76821	6.57199	6.86715	5.99331	6.17417	5.92611	6.94328	7.18198	7.56049	29.5727	42.2192	41.7386	105.388	65.399	149.975	1.42764	2.52496	1.41139	2.49622	1.76863	2.29324	0.0749695	0.000312582	0.0835157	0.000345775	0.047653	0.000143847	0.223936	0.00264052	0.200539	0.017915	0.158229	0.020326	0	1	0	1	0	1
An11g02990	An00g11738	strong similarity to astaxanthin synthetase from patent EP1035206 - Phaffia rhodozyma	7.20834	7.03125	7.80233	7.63593	8.17059	7.99951	7.13345	7.31825	6.90476	6.80672	6.96357	6.06629	6.25366	6.22028	139.082	210.712	271.545	149.691	118.742	72.5086	1.51501	0.551258	1.9524	0.710407	0.363863	0.610641	0.000185898	7.02753e-06	2.23652e-06	0.000879409	1.14886e-06	6.1199e-06	0.00297001	0.000174754	0.000114185	0.0326314	0.000178571	0.00241467	1	-1	1	-1	-1	-1
An01g13320	An00g13046	weak similarity to integral membrane protein PTH11 - Magnaporthe grisea	9.28894	9.55947	9.16459	9.5641	7.69576	7.88828	8.8645	8.601	8.23838	8.29465	8.32564	7.71042	7.68636	7.45404	687.018	659.097	221.631	425.422	312.177	196.303	0.959359	1.9195	0.322599	0.645462	2.00082	0.628821	0.698852	5.57878e-05	2.54597e-07	0.00142195	0.000608305	0.000184851	0.843776	0.000731411	3.17705e-05	0.043337	0.00655087	0.0243951	0	1	-1	-1	1	-1
An11g01810	An00g13323	weak similarity to hypothetical membrane protein YBR005w - Saccharomyces cerevisiae	6.57981	6.49521	6.71457	6.13792	6.43956	6.02274	5.23811	5.5374	5.68771	5.58928	5.56846	4.73872	4.84361	4.55637	92.8939	85.9987	75.1213	41.8674	49.015	26.2256	0.925774	0.557331	0.808679	0.486838	0.602016	0.535052	0.563365	0.000819228	0.128648	0.000153342	0.0177849	8.96768e-05	0.757164	0.00558374	0.274533	0.0106193	0.0755061	0.0136357	0	-1	0	-1	0	-1
An12g00680	An00g13904	similarity to gene expression regulator At14 from patent WO200257456-A2 - Unclassified organism	5.98941	5.52409	6.13838	6.05836	6.08016	5.60616	5.15312	5.33744	5.73753	5.65429	5.72535	4.95968	5.09978	4.99213	54.0698	68.5161	57.4072	37.9303	52.1908	32.3837	1.26718	0.660724	1.06172	0.553597	0.521413	0.620486	0.0588048	0.00347353	0.605457	0.000248303	0.00169689	0.000273164	0.189675	0.0171761	0.759345	0.0142468	0.013549	0.0315809	0	-1	0	-1	-1	-1
